# Supplementary material for: Prevalence of post-traumatic stress disorder and associated factors among Koshe landslide survivors, Addis Ababa, Ethiopia: a community-based, cross-sectional study
Source: PubMed Central journal article supplement — BMJ Open. 2019 Jun 29;9(6):e028550. doi: 10.1136/bmjopen-2018-028550 (PMC6609084; doi:10.1136/bmjopen-2018-028550), 2019-06-29
Supplement: bmjopen-2018-028550.draft_revisions.pdf [file bmjopen-2018-028550.draft_revisions.pdf]

# BMJ Open

BMJ Open is committed to open peer review. As part of this commitment we make the peer review history of every article we publish publicly available.

When an article is published we post the peer reviewers' comments and the authors' responses online. We also post the versions of the paper that were used during peer review. These are the versions that the peer review comments apply to.

The versions of the paper that follow are the versions that were submitted during the peer review process. They are not the versions of record or the final published versions. They should not be cited or distributed as the published version of this manuscript.

BMJ Open is an open access journal and the full, final, typeset and author-corrected version of record of the manuscript is available on our site with no access controls, subscription charges or pay-per-view fees (<http://bmjopen.bmj.com>).

If you have any questions on BMJ Open's open peer review process please email [info.bmjopen@bmj.com](mailto:info.bmjopen@bmj.com)

# BMJ Open

## Prevalence and associated factors of post-traumatic stress disorder among koshe landslide survivors, Addis Ababa Ethiopia: A cross sectional study

|                               |                                                                                                                                                                                                                                                                                     |
|-------------------------------|-------------------------------------------------------------------------------------------------------------------------------------------------------------------------------------------------------------------------------------------------------------------------------------|
| Journal:                      | <i>BMJ Open</i>                                                                                                                                                                                                                                                                     |
| Manuscript ID                 | bmjopen-2018-028550                                                                                                                                                                                                                                                                 |
| Article Type:                 | Research                                                                                                                                                                                                                                                                            |
| Date Submitted by the Author: | 17-Dec-2018                                                                                                                                                                                                                                                                         |
| Complete List of Authors:     | Asnakew, Sintayehu ; Debretabor University, Psychiatry shumet, shegaye; University of Gondar, psychiatry Ginbare , Worknesh ; Amanuel mental specialized hospital, Psychiatry Legas, Getasew ; Debretabor university, Psychiatry Haile , Kalkidan ; Dbremarkos hospital, psychiatry |
| Keywords:                     | PSYCHIATRY, EPIDEMIOLOGY, Adult psychiatry < PSYCHIATRY, Anxiety disorders < PSYCHIATRY, Child & adolescent psychiatry < PSYCHIATRY                                                                                                                                                 |
|                               |                                                                                                                                                                                                                                                                                     |

SCHOLARONE™  
Manuscripts

1  
2  
3  
4  
5  
6  
7  
8  
9  
10  
11  
12  
13  
14  
15  
16  
17  
18  
19  
20  
21  
22  
23  
24  
25  
26  
27  
28  
29  
30  
31  
32  
33  
34  
35  
36  
37  
38  
39  
40  
41  
42  
43  
44  
45  
46  
47  
48  
49  
50  
51  
52  
53  
54  
55  
56  
57  
58  
59  
60

***Prevalence and associated factors of post-traumatic stress disorder among  
koshe landslide survivors, Addis Ababa Ethiopia: A cross sectional study***

Sintayehu Asnakew<sup>1\*</sup>, Shegaye Shumet<sup>2</sup>, Worknesh Ginbare<sup>3</sup>, Getasew Legas<sup>1</sup>, Kalkidan Haile<sup>4</sup>

<sup>1</sup> Department of Psychiatry, College Health Sciences, Debretabor University, Debretabor, Ethiopia

<sup>2</sup> Department of psychiatry, School of medicine, College of Medicine and Health Sciences, University of Gondar, Gondar, Ethiopia

<sup>3</sup> Department of psychiatry, Amanuel mental specialized hospital, Addis Ababa, Ethiopia

<sup>4</sup> Department of psychiatry, Debre markos hospital, Debre markos, Ethiopia

SAI: [sintie579@gmail.com](mailto:sintie579@gmail.com)

SS: [shumetshegaye@yahoo.com](mailto:shumetshegaye@yahoo.com)

WG: [workneshginbare@gmail.com](mailto:workneshginbare@gmail.com)

GL: [getasewlegas@gmail.com](mailto:getasewlegas@gmail.com)

KH: [kalkidan946@gmail.com](mailto:kalkidan946@gmail.com)

\*Corresponding Author. Shegaye shumet

Department of psychiatry, university of Gondar, Gondar, Ethiopia

. Tel.: +251918045505/+251967148362 Email: [shumetshegaye@yahoo.com](mailto:shumetshegaye@yahoo.com)

## Abstract

**Objectives:** To assess the prevalence of post-traumatic stress disorder and associated factors among survivors of koshe landslide Addis Ababa, Ethiopia, 2018.

**Design:** Community based, cross-sectional design.

**Setting:** The study was conducted among survivors of koshe landslide, Addis Ababa, Ethiopia.

**Participants:** About 830 town residents were recruited for interview during the study period.

**Measurement:** Data were collected by face-to-face interview. Post-traumatic stress disorder was measured using post-traumatic stress disorder checklist-civilian version. Perceived Stress Scale (PSS) and Oslo-3 social support were an instruments used to assess the associated factors.

**Result:** Prevalence of post-traumatic stress disorder was 37.3 % with ( 95 % CI: 34.1, 40.8). In multivariate logistic regression; female sex(AOR=1.74, 95%CI; 1.21,2.50), divorced (AOR=2.08,95%CI; 1.26,3.43), sustained physical injury(AOR=8.28,95%CI; 5.04,13.61) , history of mental illness ( AOR = 5.55 , 95% CI ; 2.30 , 13.36 ) , family history of mental illness ( AOR = 2.82 , 95 %CI ; 1.48 , 5.37 ) , poor social support ( AOR = 3.64 , 95 %CI ; 1.99 , 6.69 ) , and high perceived stress ( AOR = 3.08 , 95 CI , 1.43 , 6.64 ) were associated with post-traumatic stress disorder.

**Conclusion:** The result suggest that prevalence of post-traumatic stress disorder among survivors of koshe landslide was high. It is better to give emphasis for these populations in early screening particularly for individuals with family history of mental illness, female sex, history of mental illness and for those who experienced physical trauma during the disaster.

### Strengths and limitations of this study

- The study was including relatively large sample size and sampling methods
- Social and recall bias were the limitations
- Since study was cross sectional, did not show cause effect relationship

**Keywords:** Koshe landslides, post-traumatic stress disorder

## Introduction

Posttraumatic stress disorder is a mental disorder that follows a traumatic event in which the individual experienced, witnessed, or was confronted with either actual or threatened loss of life or serious injury resulting a response of fear, helplessness, or horror(1). In order to be diagnosed with PTSD, a person must have re-experiencing of the trauma, avoidance of trauma-related stimuli, excessive arousal, and negative alterations in cognition and mood and that must occur 1 month after the event(2). A disaster is a traumatic event that is experienced by many people and causes different mental and physical health consequences(3). A survey study conducted in US residents, 13% of the sample reported a lifetime exposure to natural or human-generated disaster(4). According to several studies undertaken among adults, there was an increased psychological distress after natural disasters(5). Although the consequences of disasters may include a wide range of psychopathology, a systematic review has acknowledged that PTSD is the most commonly studied and frequently occurred psychopathology following disasters(6).

About 8 million adults have PTSD during a given year worldwide(7). More than fifty-one million people are being forcibly displaced worldwide, of which 16.7 million are displaced outside their home countries which were found to have a stress-related disorder(8). According to the global burden of disease report, about 14% of the diseases burden has been attributed to neuropsychiatric disorders, mostly due to long term disabling nature of depression, and other common mental disorders including PTSD(9). Post-traumatic stress disorder (PTSD) was estimated to account for 0.4% of total YLD, around the same percentage as schizophrenia. According to the global burden of disease 2000 study, published in the World Health Report 2001, the estimated burden of PTSD has increased to 0.6% YLD globally (10). The lifetime prevalence of PTSD is estimated to be about 8 % in the general population in the USA and the lifetime prevalence rate was 10 % in women and 4 % in men(11). Study among Israeli residents age 18 years and above who were exposed to terrorism, prevalence of current PTSD was 9.4%, with higher rates among women (16.2%) than men (2.4%)(12). The global economic burden of stress-related mental illness is expected to rise in the coming decade. The world health organization global disease of burden study estimates that mental illness, including stress-related disorder, will be the second leading cause of disability by the year 2020(13).

1  
2 PTSD prevalence rate in developing countries is higher as compared with the more developed  
3 countries. A study conducted among a geographically diverse sample of Mexican adults, the  
4 prevalence of PTSD was estimated to be 19%(14). Different studies undertaken in Africa indicated  
5 that PTSD can still be a public health concern several years after the civil conflict and post-disaster  
6 setting. A recent community-based study in South Africa showed that trauma exposure is higher  
7 in lower-income countries compared with high-income countries which resulted in a high rate of  
8 PTSD(15). Study in Uganda during an active conflict period showed that PTSD prevalence varied  
9 between 18% and 54 % in the general population (16).

10  
11 PTSD is a public health issue that contributes for poverty, lack of employment, unsecured living  
12 circumstances, change in social network and highly associated with lower quality of life (QOL)  
13 even after the end of the actual hostility and post-disaster setting (17, 18).

14  
15 Factors that contribute for the development of post-traumatic stress disorder have been classified  
16 into pre-existing factors like family history of mental illness, and substance history, the traumatic  
17 event itself, post-trauma factors such as social support (19).

18  
19 Even though PTSD are highly prevalent among post post-disaster setting, there is no studies which  
20 shows prevalence of PTSD among survivors of koshe landslide Addis Ababa, Ethiopia. So  
21 determining prevalence of PTSD and associated factors among survivors of koshe landslide Addis  
22 Ababa is important for early intervention and further decrease the burden of PTSD and contribute  
23 to have a plane for improving victims' quality of life.

## 24 25 26 27 28 29 30 31 32 33 34 35 36 37 38 39 40 41 42 43 44 45 46 47 48 49 50 51 52 53 54 55 56 57 58 59 60

### Objective

This study set out to assess the prevalence of post-traumatic stress disorder and associated factors among survivors of koshe landslide Addis Ababa, Ethiopia, 2018.

### Methods and materials

Study settings and populations

#### Study design

The study employed a community based, cross-sectional study. It was conducted may to june 2018.

#### Study setting

The study was conducted at koshe, a large open landfill which receives rubbish and waste from Addis Ababa, which is located in the southwestern part of Addis Ababa, Ethiopia within

1  
2 boundaries of Nefas Silk-Lafto and Kolfie. It has served for about 50 years for solid waste disposal  
3 for a city. The landfill hosts hundreds of rubbish pickers who sell recovered materials from the  
4 waste to businessmen and farmers.  
5

### 6 **Study participants/subjects**

7  
8  
9 The study includes all survivors of koshe landslide, who were living in the study areas, Addis  
10 Ababa. Ethiopia. It had a total population of 5316 and estimated number of households of the  
11 region were about 1035 and there was one health center serving the community. We exclude those  
12 participants who were seriously ill and unable to communicate.  
13  
14  
15

### 16 **Sampling procedure**

17  
18 A multistage sampling technique was used to select 830 participants. To reach the households  
19 simple random sampling technique was used (computer generated random number). The sample  
20 size was distributed to each area (Kilinto, Asko Addis Hiwot and Koshe garbage dump area)  
21 proportional to the household size of the area. Members of the selected household were further  
22 selected for an interview and only one individual was selected per HH.  
23  
24  
25  
26  
27

### 28 **Data sources and measurement**

29  
30  
31 Data were collected via a face to face interview structured questionnaire. Supervisors had a BSc  
32 Degree in Psychiatric Nursing, and they were trained to explain purpose of the study, orient  
33 subjects on the questionnaire as well as the ethical principles of confidentiality/ anonymity and  
34 data management prior to involvement in data collection, secure subjects' informed consent for  
35 participation.  
36  
37

38  
39  
40 *Post-traumatic stress disorder* Checklist-Civilian version (PCL-C) was used to assess post-  
41 traumatic stress disorder. PCL-C is measured with likert type scale ranging from ( 1) "Not at all"  
42 to (5) "Extremely" with a cut point of  $\geq 50$ . It had shown high internal consistency and reliability  
43 and strong correlation with PTSD diagnosis using clinician-administered PTSD scale translated  
44 versions of the PCL-C into Oromo and Somali produced high reliability with Cronbach's  $\alpha$   
45 (.93)(52) and has 0.89 sensitivity and 0.75 specificity(53). In the current study, the inter-data  
46 reliability or internal consistency was found to be Cronbach's  $\alpha$  (0.94).  
47  
48  
49  
50  
51  
52  
53  
54  
55  
56

1  
2 *Social support* was measured using Oslo 3-items social support scale and with scores ranging  
3  
4 between 3 and 14: 3–8=poor social support; 9–11=intermediate social support; and 12–14=strong  
5  
6 social support (50).

7 *Individual stress levels* were measured using the Perceived Stress Scale (PSS). The questions in  
8  
9 this scale ask about their feelings and thoughts during the last month. PSS is measured with likert  
10  
11 type scale ranging from ( 0) “Never” to (4) “very often ” and individuals with higher scores  
12  
13 indicating higher perceived stress(48).

14 *Substance use history*: To examine substance use history, respondents were asked: “Have you ever  
15  
16 use any substance in the last three months or in life time?” and the response were yes/no (51)

17 *Items on socio-demographic factors* (age, sex, ethnicity, religion, marital status, educational status  
18  
19 and occupational status) were adopted from different literatures

### 20 21 **Data collection**

22  
23 Data were collected by four trained data collectors (psychiatry nurses) using the Amharic version  
24  
25 of the questionnaire for a month. The questionnaire was designed in English and was translated to  
26  
27 Amharic and back to English, that is, forward and backward translation. The training was on  
28  
29 introduction to PTSD, research methods, interviewing skills, sampling and recruitment and ethical  
30  
31 aspects of research.

### 32 **Data processing and analysis**

33  
34 All collected data were checked for completeness and consistency and entered in to Epi-data  
35  
36 version 4.2 and then exported to SPSS for windows version 24 for analysis.

37  
38 Descriptive and bivariate logistic regression analyses were computed to see frequency distribution  
39  
40 and to test whether there were an association between the independent and dependent variables  
41  
42 respectively. Factors associated with PTSD were selected during bivariate analysis with a value of  
43  
44  $p \leq 0.05$  for further analysis in multivariable regression analysis. In multivariable regression  
45  
46 analysis variables with P-value less than 0.05 at 95% confidence interval were considered as  
47  
48 statistically significant.

### 49 50 **Ethical Consideration**

51  
52 Ethical clearance was obtained from joint ethical review committees of University of Gondar and  
53  
54 Amanuel mental specialized hospital. Permission was obtained from Addis Ababa city  
55  
56



Administration health bureau ethical committee. Written consent was taken from study participants and assent from legally approved foster parents after explaining purpose of the study. Confidentiality was maintained by omitting their personal identification.

### **Patient and public involvement**

In the current study our study participants are people who survive at koshe landslide, Addis, Ababa, Ethiopia, and patients were not included in this study. Our study participants were also not involved in the study design and recruitment. The results of this study will be disseminated to Federal ministry of health, Addis Ababa health bureau, and Kolfe sub city health department for timely management of those survivors through presentation and policy briefing.

### **Result**

A total of 830 respondents were participated in the study with the response rate of 98.2%. Majority of the respondents were female 491 (59.2%). The mean age of the respondents was 33 with SD  $\pm 12$  years, of whom 675 (81.3%) were included in the age range of 15-40 years. Majority of the respondents were married 428(51.6%), orthodox followers 502 (60.5%) and Amhara by ethnicity 404 (48.7%). Regarding their occupation, most of them were employed 470(56.6%) (**table 1**).

About 55(6.6%) of participants had history of mental illness. About 202 (24.3%) of them had childhood physical abuse and neglect experience, and seventy-nine (9.5%) of them had family history of mental illness.

Majority of 569 (68.6%) of the respondents had witnessed physical injury of families or friends, and about 166 (20%) of the respondents had experienced physical injury and majority of them (70 %) had a moderate perceived life threat (**table 2**) .

Table 1: Distribution of trauma factors of the respondents in koshe Addis Ababa, Ethiopia, August 2018 (n=830)

| Characteristics                                   | Frequency | Percentage |
|---------------------------------------------------|-----------|------------|
| Sustaining physical injury                        | 166       | 20         |
| Witnessing the death of families or friends       | 526       | 63.4       |
| Witnessing physical injury of families or friends | 569       | 68.6       |
| Property destruction                              | 240       | 28.9       |
| Thinking that they may be died                    | 546       | 65.8       |
| Perceived life threat                             |           |            |
| Low perceived stress                              | 185       | 22.3%      |
| Moderate perceived stress                         | 581       | 70%        |
| High perceived stress                             | 64        | 7.7%       |

Out of the total 830 participants, nearly half (48%) of the respondents had poor social support and majority 659(79.4%) of the participants had experienced at least one stress full life events (**table 3**).

Table 2: Distribution of psychosocial factors of study participants among residents of koshe Addis Ababa, Ethiopia, 2018(n= 83)

| Characteristics              | Category | Frequency | percent |
|------------------------------|----------|-----------|---------|
| <b>Social support</b>        | Poor     | 398       | 48      |
|                              | Moderate | 324       | 39      |
|                              | Strong   | 108       | 13      |
| <b>Stressful life events</b> | Yes      | 659       | 79.4    |
|                              | No       | 171       | 20.6    |

Nearly three fourth (**72.5%**) of the participants had ever use of alcohol and about (62.2%) of the respondents had current use of alcohol (Fig 1).

## Prevalence of PTSD

The prevalence of post-traumatic stress disorder (PTSD) in this population was 37.3% (95 % CI: 34.1, 40.8) (Fig2).

## Factors associated with posttraumatic stress disorder

To determine the association of independent variables with PTSD, bivariate and multivariate binary logistic regression analysis were carried out.

In the bivariate analysis posttraumatic stress disorder in relation to each explanatory variables : female sex, age >60 years , divorced in marital status, history of mental illness, family history of mental illness, experiencing childhood physical trauma and neglect, sustained physical injury, witnessing the death and physical injury of families or friends, property destruction, thought that they may die, poor social support, and high perceived life threat were found to be significant at a P value less than 0.05. These factors were entered into multivariable logistic regression for further analysis. In multivariate analysis female sex, divorced, history of mental illness, family history of mental illness, sustained physical injury, poor social support and high perceived life threat were significantly associated with PTSD at a p-value less than 0.05 (Table 4).

Table 3: Factors associated with PTSD among residents of Koshe, Addis Ababa, Ethiopia, 2018 (n= 830)

| Variables                                | Category | PTSD |     | COR(95%CI)        | AOR(95%CI)         |
|------------------------------------------|----------|------|-----|-------------------|--------------------|
|                                          |          | Yes  | No  |                   |                    |
| Sex                                      | Male     | 106  | 233 | 1                 | 1                  |
|                                          | Female   | 204  | 287 | 1.56(1.17,2.09)   | 1.74(1.21,2.50)**  |
| Age                                      | 15-40    | 241  | 434 | 1                 | 1                  |
|                                          | >40      | 69   | 86  | 1.45(1.01,2.06)   | 1.36(0.86,2.14)    |
| Marital status                           | Married  | 138  | 290 | 1                 | 1                  |
|                                          | Single   | 87   | 162 | 1.13(0.81,1.57)   | 1.18(0.78,1.79)    |
|                                          | Divorced | 77   | 54  | 3.00(2.00,4.48)   | 2.08(1.26,3.43)**  |
|                                          | Others   | 8    | 14  | 1.20(0.49,2.93)   | 1.43(0.49,4.18)    |
| Hx. of mental illness                    | Yes      | 46   | 9   | 9.89(4.77,20.52)  | 5.55(2.30,13.36)** |
|                                          | No       | 264  | 511 | 1                 | 1                  |
| Family Hx of mental illness              | Yes      | 55   | 24  | 4.46(2.69,7.37)   | 2.82(1.48,5.37)**  |
|                                          | No       | 255  | 496 | 1                 | 1                  |
| Experiencing Childhood trauma            | Yes      | 109  | 93  | 2.49(1.80,3.44)   | 1.17(0.74,1.85)    |
|                                          | No       | 201  | 427 | 1                 | 1                  |
| Sustaining Physical trauma               | Yes      | 135  | 31  | 12.17(7.94,18.65) | 8.28(5.04,13.61)** |
|                                          | No       | 175  | 489 | 1                 | 1                  |
| Witnessing the death of Family or friend | yes      | 223  | 303 | 1.89(1.36,2.49)   | 0.84(0.50,1.40)    |
|                                          | No       | 87   | 217 | 1                 | 1                  |
| Witnessing injury of family or friend    | Yes      | 238  | 331 | 1.89(1.37,2.59)   | 0.82(0.49,1.37)    |
|                                          | No       | 2    | 189 | 1                 | 1                  |
| Property destruction                     | Yes      | 117  | 123 | 1.96(1.44,2.66)   | 1.01(0.68,1.51)    |
|                                          | No       | 193  | 397 | 1                 | 1                  |
| Thought of death                         | Yes      | 242  | 304 | 2.53(1.84,3.48)   | 1.31(0.86,1.99)    |
|                                          | No       | 68   | 216 | 1                 | 1                  |
| Social support                           | poor     | 209  | 189 | 4.87(2.88,8.23)   | 3.64(1.99,6.69)**  |
|                                          | Moderate | 81   | 243 | 1.47(0.85,2.53)   | 1.39(0.75,2.60)    |
|                                          | Strong   | 20   | 88  | 1                 | 1                  |
| Perceived threat                         | Low      | 56   | 129 | 1                 | 1                  |
|                                          | Moderate | 209  | 372 | 2.94(1.89,4.56)   | 1.02(0.66,1.58)    |
|                                          | High     | 45   | 19  | 10.91(5.56,21.41) | 3.08(1.43,6.64)**  |

key:\*\*=p-value<0.05,Model fitness=0.114 (hosmer and lemshow),=0.000(Omnibus test), no multicollinearity (tolerance>0.1 and VIF<2)

## Discussion

The prevalence of PTSD was found to be 37.3% (95% CI; 34.1, 40.8). This finding was in line with the studies conducted in Kerman earth quick 36.3%(34), Syrian refugees in Lebanon,35.4%(8), turkey 34.9%(28), P. Mur-rah federal building in Oklahoma city, USA 34.3% (25), and USA general population,39.5%(54). On the other hand this study finding was lower than the previous studies in South Sudan (48%)(41), Rana Plaza building collapse in Bangladesh (75.6%)(22), Saudi Arabia (57%)(23), former Yugoslavia living in Croatia, Serbia, Germany and U.K. (83.7%)(18), Fukushima nuclear disaster Japan(59.4%)(26). The possible reason for this high prevalence might be instrument difference (PCL-C cut off 45, CAPTSD scale), exposure to multiple trauma, sample size difference and study conducted during an active conflict.

This finding was higher than studies in Northern Uganda (11.8%)(37), Serbia(18.8%)(29), Southern Lebanon(29.3%)(33), Sothern Brazil(9.1%)(36), India(4.2%)(27), Kashmir Southern Asia India(7.3%)(31), Australia(1.33%)(32), Wenchuan earth quick in China (15.7%)(21), USA ( among world trade center disaster rescue and recovery worker 12.4%)(24), and USA(Alabama, Joplin, Missouri 6.7%)(30). The possible reason for this variation might be instrument difference ( GHQ-12, structured clinical interview, MINI, the modified version of a composite international diagnostic interview ), the method of data collection (structured telephone interview ) and delayed conduction of the study after the trauma.

In this study, being female were significantly associated with PTSD. It might be due to, females have experienced sexual assault and child sexual abuse than males, hence being exposed to such trauma is more risk than other trauma in causing PTSD(55). This finding was supported by the research conducted in Kenya(38), India(27), Bangladesh(22), Kerman in Iran(34), China(21), USA(30), Oklahoma city USA(25).

Participants who were divorced were more likely to develop PTSD as compared with married respondents. Those with younger children might have concerns often center on raising their family alone, financial worries tend to fill the minds of most people facing life without their partner, especially those with young children which leads to be stressed. This was supported by the research conducted in Serbia(45).

Having history of mental illness was also significantly associated with PTSD. Participants with history of mental illness might have neurochemical imbalance and neuronal damage

1  
2 as compared to those who had no history of mental illness, as a result they might prone to  
3 develop PTSD after this phenomenon. This finding was supported by studies in, Kenya(38),  
4 Fukushima nuclear disaster(26), Brewin University College London(42), Southern  
5 Korea(44), and Alferd.P.Mur Rah federal building bombing in Oklahoman city USA(25).  
6  
7  
8

9  
10 The odds of developing PTSD was 2.8 times higher among respondents who had family  
11 history of mental illness than those who had no family history of mental illness. The possible  
12 explanation might be, the inheritance of the serotonin transporter gene, as well as genes  
13 associated with the hypothalamic–pituitary–adrenal axis. This finding was supported by the  
14 studies conducted in Brewin University College London(42), and South Korea(44).  
15  
16  
17

18  
19 Moreover, experiencing physical injury was the strongest predictors of PTSD as compared  
20 with those individuals who didn't experience physical injury during the phenomenon. The  
21 possible explanation could be, the presence of scars, having impaired part may remind the  
22 trauma and relive it and may believe that the traumatic event has been put behind them, the  
23 body could be clinging to unresolved issues. This result was explained similarly in  
24 researches conducted in Wenchuan earth quick in China(21), the Rana Plaza building  
25 collapse in Bangladesh(22), and Kerman Iran(34).  
26  
27  
28  
29  
30

31  
32 The odds of developing PTSD was 3.6 times higher among individuals who had poor social  
33 support than those had higher social support. Lack of help with physical exercise, emotional  
34 support and having someone to talk with about traumatic experience or to turn to for advice  
35 could increase the risk of PTSD(56). This finding was supported by the studies conducted  
36 in Southern Brazil(36), Mexico(46), and USA(20).  
37  
38  
39  
40

41  
42 Participants who had high perceived stress were more likely to develop PTSD as compared with  
43 those respondents who hadn't low perceived stress. The negative belief towards the consequence  
44 of ongoing threat as damaging implications will precipitate the onset and persistence of PTSD(57).  
45 This finding was supported by the research done in Southern Israel(43), and Southern Korea(44).  
46  
47 There were several limitations. The design of the study was cross sectional; therefore we were  
48 unable to conclude any causal direction of the association found and in this study participants did  
49 not consider whether they have PTSD or not before the onset of land slide due to other factors.  
50  
51  
52  
53  
54  
55  
56  
57  
58  
59  
60  
61  
62  
63  
64  
65  
66  
67  
68  
69  
70  
71  
72  
73  
74  
75  
76  
77  
78  
79  
80  
81  
82  
83  
84  
85  
86  
87  
88  
89  
90  
91  
92  
93  
94  
95  
96  
97  
98  
99  
100  
101  
102  
103  
104  
105  
106  
107  
108  
109  
110  
111  
112  
113  
114  
115  
116  
117  
118  
119  
120  
121  
122  
123  
124  
125  
126  
127  
128  
129  
130  
131  
132  
133  
134  
135  
136  
137  
138  
139  
140  
141  
142  
143  
144  
145  
146  
147  
148  
149  
150  
151  
152  
153  
154  
155  
156  
157  
158  
159  
160  
161  
162  
163  
164  
165  
166  
167  
168  
169  
170  
171  
172  
173  
174  
175  
176  
177  
178  
179  
180  
181  
182  
183  
184  
185  
186  
187  
188  
189  
190  
191  
192  
193  
194  
195  
196  
197  
198  
199  
200  
201  
202  
203  
204  
205  
206  
207  
208  
209  
210  
211  
212  
213  
214  
215  
216  
217  
218  
219  
220  
221  
222  
223  
224  
225  
226  
227  
228  
229  
230  
231  
232  
233  
234  
235  
236  
237  
238  
239  
240  
241  
242  
243  
244  
245  
246  
247  
248  
249  
250  
251  
252  
253  
254  
255  
256  
257  
258  
259  
260  
261  
262  
263  
264  
265  
266  
267  
268  
269  
270  
271  
272  
273  
274  
275  
276  
277  
278  
279  
280  
281  
282  
283  
284  
285  
286  
287  
288  
289  
290  
291  
292  
293  
294  
295  
296  
297  
298  
299  
300  
301  
302  
303  
304  
305  
306  
307  
308  
309  
310  
311  
312  
313  
314  
315  
316  
317  
318  
319  
320  
321  
322  
323  
324  
325  
326  
327  
328  
329  
330  
331  
332  
333  
334  
335  
336  
337  
338  
339  
340  
341  
342  
343  
344  
345  
346  
347  
348  
349  
350  
351  
352  
353  
354  
355  
356  
357  
358  
359  
360  
361  
362  
363  
364  
365  
366  
367  
368  
369  
370  
371  
372  
373  
374  
375  
376  
377  
378  
379  
380  
381  
382  
383  
384  
385  
386  
387  
388  
389  
390  
391  
392  
393  
394  
395  
396  
397  
398  
399  
400  
401  
402  
403  
404  
405  
406  
407  
408  
409  
410  
411  
412  
413  
414  
415  
416  
417  
418  
419  
420  
421  
422  
423  
424  
425  
426  
427  
428  
429  
430  
431  
432  
433  
434  
435  
436  
437  
438  
439  
440  
441  
442  
443  
444  
445  
446  
447  
448  
449  
450  
451  
452  
453  
454  
455  
456  
457  
458  
459  
460  
461  
462  
463  
464  
465  
466  
467  
468  
469  
470  
471  
472  
473  
474  
475  
476  
477  
478  
479  
480  
481  
482  
483  
484  
485  
486  
487  
488  
489  
490  
491  
492  
493  
494  
495  
496  
497  
498  
499  
500  
501  
502  
503  
504  
505  
506  
507  
508  
509  
510  
511  
512  
513  
514  
515  
516  
517  
518  
519  
520  
521  
522  
523  
524  
525  
526  
527  
528  
529  
530  
531  
532  
533  
534  
535  
536  
537  
538  
539  
540  
541  
542  
543  
544  
545  
546  
547  
548  
549  
550  
551  
552  
553  
554  
555  
556  
557  
558  
559  
560  
561  
562  
563  
564  
565  
566  
567  
568  
569  
570  
571  
572  
573  
574  
575  
576  
577  
578  
579  
580  
581  
582  
583  
584  
585  
586  
587  
588  
589  
590  
591  
592  
593  
594  
595  
596  
597  
598  
599  
600  
601  
602  
603  
604  
605  
606  
607  
608  
609  
610  
611  
612  
613  
614  
615  
616  
617  
618  
619  
620  
621  
622  
623  
624  
625  
626  
627  
628  
629  
630  
631  
632  
633  
634  
635  
636  
637  
638  
639  
640  
641  
642  
643  
644  
645  
646  
647  
648  
649  
650  
651  
652  
653  
654  
655  
656  
657  
658  
659  
660  
661  
662  
663  
664  
665  
666  
667  
668  
669  
670  
671  
672  
673  
674  
675  
676  
677  
678  
679  
680  
681  
682  
683  
684  
685  
686  
687  
688  
689  
690  
691  
692  
693  
694  
695  
696  
697  
698  
699  
700  
701  
702  
703  
704  
705  
706  
707  
708  
709  
710  
711  
712  
713  
714  
715  
716  
717  
718  
719  
720  
721  
722  
723  
724  
725  
726  
727  
728  
729  
730  
731  
732  
733  
734  
735  
736  
737  
738  
739  
740  
741  
742  
743  
744  
745  
746  
747  
748  
749  
750  
751  
752  
753  
754  
755  
756  
757  
758  
759  
760  
761  
762  
763  
764  
765  
766  
767  
768  
769  
770  
771  
772  
773  
774  
775  
776  
777  
778  
779  
780  
781  
782  
783  
784  
785  
786  
787  
788  
789  
790  
791  
792  
793  
794  
795  
796  
797  
798  
799  
800  
801  
802  
803  
804  
805  
806  
807  
808  
809  
810  
811  
812  
813  
814  
815  
816  
817  
818  
819  
820  
821  
822  
823  
824  
825  
826  
827  
828  
829  
830  
831  
832  
833  
834  
835  
836  
837  
838  
839  
840  
841  
842  
843  
844  
845  
846  
847  
848  
849  
850  
851  
852  
853  
854  
855  
856  
857  
858  
859  
860  
861  
862  
863  
864  
865  
866  
867  
868  
869  
870  
871  
872  
873  
874  
875  
876  
877  
878  
879  
880  
881  
882  
883  
884  
885  
886  
887  
888  
889  
890  
891  
892  
893  
894  
895  
896  
897  
898  
899  
900  
901  
902  
903  
904  
905  
906  
907  
908  
909  
910  
911  
912  
913  
914  
915  
916  
917  
918  
919  
920  
921  
922  
923  
924  
925  
926  
927  
928  
929  
930  
931  
932  
933  
934  
935  
936  
937  
938  
939  
940  
941  
942  
943  
944  
945  
946  
947  
948  
949  
950  
951  
952  
953  
954  
955  
956  
957  
958  
959  
960  
961  
962  
963  
964  
965  
966  
967  
968  
969  
970  
971  
972  
973  
974  
975  
976  
977  
978  
979  
980  
981  
982  
983  
984  
985  
986  
987  
988  
989  
990  
991  
992  
993  
994  
995  
996  
997  
998  
999  
1000

1  
2 to face interview which make individuals to respond socially acceptable answer during the  
3 interview process especially in case of substance related questions.

4  
5 Individuals without PTSD may have less motivation to recall earlier exposure as compared with  
6 individuals with PTSD. So recall bias could be the limitation.

7  
8  
9 The strength of the study was including relatively large sample size and sampling methods.

## 14 **Conclusion**

15  
16 The prevalence of PTSD was found to be high. Female sex, divorced participants, history of mental  
17 illness, family history of mental illness, sustained physical injury, poor social support and high  
18 perceived life threat were significantly associated with PTSD. Therefore; It is better to give  
19 emphasis for these populations in early screening particularly for individuals with family history  
20 of mental illness, female sex, history of mental illness and for those who experienced physical  
21 trauma during the disaster.

## 30 **Lists of abbreviations:**

31  
32  
33 AMSH: Amanuel Mental Specialized Hospital; AOR: Adjusted Odd Ratio, CI: Confidence  
34 Interval; COR: Crude Odd Ratio; DSM: Diagnostic and Statistical Manual; HH: House Hold;  
35 M.I.N.I: Mini International Neuropsychiatric Interview; OSS-3: Oslo 3 Items Social Support  
36 Scale; PCL-C: Post Traumatic Stress Disorder Civilian Version; PTSD: Post Traumatic Stress  
37 Disorder; QOL: Quality Of Life; SPSS: Statistical Package for Social Science; U.S: United States;  
38 UOG: University Of Gondar; WHO: World Health Organization

## 44 **Declarations**

### 46 **Ethical approval and consent to participate:**

47  
48 Ethical clearance was obtained from joint ethical review committees of the University of Gondar  
49 and Amanuel mental specialized hospital. A formal letter of permission obtained and submitted to  
50 the respective town administration. Informed consent was obtained from participants and  
51 confidentiality was maintained by omitting their personal identification

1  
2 **Consent to publication:** Not applicable  
3

4 ***Availability of data and materials:***  
5

6  
7 Data will be available upon request from the corresponding author.  
8

9 ***Competing interests:*** The authors declare that they have no competing interests.  
10  
11

12  
13  
14 ***Funding***  
15

16 The funder has no role in collection, analysis and interpretation of data and in writing the  
17 manuscript.  
18

19 **Authors' contribution:** SA developed the proposal, supervised the data collection, analyzed the  
20 data and wrote the draft manuscript. All the coauthors revised the proposal, checked the data  
21 analysis, and revised and approved the manuscript.  
22  
23

24  
25 **Acknowledgment**  
26

27 The authors acknowledge university of Gondar and Amanuel Mental Specialized Hospital for  
28 funding the study. We extend our gratitude to data collectors, supervisors and study participants  
29 for their time and effort.  
30  
31

32  
33  
34 **References**  
35

- 36  
37 1. Heinrichs M, Wagner D, Schoch W, Soravia LM, Hellhammer DH, Ehlert U. Predicting  
38 posttraumatic stress symptoms from pretraumatic risk factors: a 2-year prospective follow-up  
39 study in firefighters. *American Journal of Psychiatry*. 2005;162(12):2276-86.  
40  
41 2. Association AP. *Diagnostic and statistical manual of mental disorders (DSM-5®)*:  
42 American Psychiatric Pub; 2013.  
43  
44 3. Norris FH, Friedman MJ, Watson PJ, Byrne CM, Diaz E, Kaniasty K. 60,000 disaster  
45 victims speak: Part I. An empirical review of the empirical literature, 1981–2001. *Psychiatry*:  
46 *Interpersonal and biological processes*. 2002;65(3):207-39.  
47  
48 4. Burkle Jr FM. Acute-phase mental health consequences of disasters: implications for triage  
49 and emergency medical services. *Annals of emergency medicine*. 1996;28(2):119-28.  
50  
51  
52  
53  
54  
55  
56



- 1  
2  
3  
4  
5  
6  
7  
8  
9  
10  
11  
12  
13  
14  
15  
16  
17  
18  
19  
20  
21  
22  
23  
24  
25  
26  
27  
28  
29  
30  
31  
32  
33  
34  
35  
36  
37  
38  
39  
40  
41  
42  
43  
44  
45  
46  
47  
48  
49  
50  
51  
52  
53  
54  
55  
56  
57  
58  
59  
60
5. Gates MA, Holowka DW, Vasterling JJ, Keane TM, Marx BP, Rosen RC. Posttraumatic stress disorder in veterans and military personnel: Epidemiology, screening, and case recognition. *Psychological services*. 2012;9(4):361.
6. Galea S, Nandi A, Vlahov D. The epidemiology of post-traumatic stress disorder after disasters. *Epidemiologic reviews*. 2005;27(1):78-91.
7. L. HG. Heather Graham L. How Common is PTSD? National Center for PTSD. 2015.:1. National Center for PTSD 2015:1.
8. Kazour F, Zahreddine NR, Maragel MG, Almustafa MA, Soufia M, Haddad R, et al. Post-traumatic stress disorder in a sample of Syrian refugees in Lebanon. *Comprehensive psychiatry*. 2017;72:41-7.
9. Prince M, Patel V, Saxena S, Maj M, Maselko J, Phillips MR, et al. No health without mental health. *The lancet*. 2007;370(9590):859-77.
10. Ayuso-Mateos JL. Global Burden of post-traumatic stress disorder in the year 2000: version 1 estimates. *World Health Organ*. 2002.
11. Kaplan BJ. Kaplan and Sadock's Synopsis of Psychiatry. Behavioral Sciences/Clinical Psychiatry. *Tijdschrift voor Psychiatrie*. 2016;58(1):78-9.
12. Bleich A, Gelkopf M, Solomon Z. Exposure to terrorism, stress-related mental health symptoms, and coping behaviors among a nationally representative sample in Israel. *Jama*. 2003;290(5):612-20.
13. Kalia M. Assessing the economic impact of stress [mdash] The modern day hidden epidemic. *Metabolism-Clinical and Experimental*. 2002;51(6):49-53.
14. Norris FH, Murphy AD, Baker CK, Perilla JL, Rodriguez FG, Rodriguez JdJG. Epidemiology of trauma and posttraumatic stress disorder in Mexico. *Journal of abnormal psychology*. 2003;112(4):646.
15. Atwoli L, Stein DJ, Koenen KC, McLaughlin KA. Epidemiology of posttraumatic stress disorder: prevalence, correlates and consequences. *Current opinion in psychiatry*. 2015;28(4):307.
16. Ozer EJ, Best SR, Lipsey TL, Weiss DS. Predictors of posttraumatic stress disorder and symptoms in adults: a meta-analysis. *Psychological bulletin*. 2003;129(1):52.
17. Akinyemi OO, Owoaje ET, Ige OK, Popoola OA. Comparative study of mental health and quality of life in long term refugees and host populations in Oru-Ijebu, Southwest Nigeria. *BMC research notes*. 2012;5(1):394.

- 1  
2 18. Priebe S, Matanov A, Janković Gavrilović J, McCrone P, Ljubotina D, Knežević G, et al.  
3  
4 Consequences of untreated posttraumatic stress disorder following war in former Yugoslavia:  
5 morbidity, subjective quality of life, and care costs. *Croatian medical journal*. 2009;50(5):465-75.  
6
- 7 19. Keane TM, Marshall AD, Taft CT. Posttraumatic stress disorder: etiology, epidemiology,  
8 and treatment outcome. *Annu Rev Clin Psychol*. 2006;2:161-97.  
9
- 10 20. CLa. M. The History, Prevalence, and Measurement of Posttraumatic Stress Disorder. .  
11 *Behav Meas Lett*. 2017;2(12):5.  
12
- 13 21. Zhou X, Kang L, Sun X, Song H, Mao W, Huang X, et al. Prevalence and risk factors of  
14 post-traumatic stress disorder among adult survivors six months after the Wenchuan earthquake.  
15 *Comprehensive psychiatry*. 2013;54(5):493-9.  
16
- 17 22. Fitch T, Villanueva G, Quadir M, Alamgir H. Prevalence and risk factors for PTSD in  
18 injured workers in Bangladesh: a study of surviving workers from the Rana Plaza building  
19 collapse. *The Lancet Global Health*. 2015;3:S33.  
20
- 21 23. Alghamdi M, Hunt N, Thomas S. Prevalence rate of PTSD, Depression and Anxiety  
22 symptoms among Saudi Firefighters. *Journal of Traumatic Stress Disorders and Treatment*.  
23 2016;6(1):1-6.  
24
- 25 24. Perrin MA, DiGrande L, Wheeler K, Thorpe L, Farfel M, Brackbill R. Differences in PTSD  
26 prevalence and associated risk factors among World Trade Center disaster rescue and recovery  
27 workers. *American Journal of Psychiatry*. 2007;164(9):1385-94.  
28
- 29 25. North C, Nixon S, Shariat S. Psychiatric Disorders Among Survivors of the Oklahoma City  
30 Bombing. *Year Book of Psychiatry and Applied Mental Health*. 2001;2001(1):226-7.  
31
- 32 26. Tsujiuchi T, Yamaguchi M, Masuda K, Tsuchida M, Inomata T, Kumano H, et al. High  
33 prevalence of post-traumatic stress symptoms in relation to social factors in affected population  
34 one year after the Fukushima nuclear disaster. *PloS one*. 2016;11(3):e0151807.  
35
- 36 27. Arnberg FK, Johannesson KB, Michel P-O. Prevalence and duration of PTSD in survivors  
37 6 years after a natural disaster. *Journal of anxiety disorders*. 2013;27(3):347-52.  
38
- 39 28. Ataman M. Prevalence of PTSD and related factors in communities living in conflictual  
40 area: Diyarbakir case. 2008.  
41
- 42 29. Lecic-Tosevski D PB, Miladinovic T, Toskovic O, Priebe S. Posttraumatic stress disorder  
43 in a Serbian community: seven years after trauma exposure. . *The Journal of nervous and mental*  
44 *disease*. 2013(201):1040-4.  
45  
46  
47  
48  
49  
50  
51  
52  
53  
54  
55  
56  
57  
58  
59  
60

- 1  
2  
3  
4  
5  
6  
7  
8  
9  
10  
11  
12  
13  
14  
15  
16  
17  
18  
19  
20  
21  
22  
23  
24  
25  
26  
27  
28  
29  
30  
31  
32  
33  
34  
35  
36  
37  
38  
39  
40  
41  
42  
43  
44  
45  
46  
47  
48  
49  
50  
51  
52  
53  
54  
55  
56  
57  
58  
59  
60
30. Zachary W. Adams JAS CKD, 1Jenna L. McCauley, 1Heidi S. Resnick, 1Kirstin Grēos, 1, 2Lisa A. Paul, 3Kyleen E. Welsh 1andKenneth J. Ruggiero. . Prevalence and predictors of PTSD and depression among adolescent victims of the Spring 2011 tornado outbreak *Adams Journal of Child Psychology and Psychiatry - Wiley Online Library*. 2014:1047–55.
31. Margoob MA, Ahmad SA. Community prevalence of adult post traumatic stress disorder in south Asia: Experience from Kashmir. *JK-Practitioner*. 2006;13(Suppl 1):S18-S25.
32. Creamer M BP, McFarlane AC. . Post-traumatic stress disorder: findings from the Australian National Survey of Mental Health and Well-being. . *Psychological medicine*. 2001;7(31):1237-47.
33. Farhood L, Dimassi H, Lehtinen T. Exposure to war-related traumatic events, prevalence of PTSD, and general psychiatric morbidity in a civilian population from Southern Lebanon. *Journal of transcultural nursing*. 2006;17(4):333-40.
34. N. P. Post-Traumatic Stress Disorder in Bam-Survived Students Who Immigrated to Kerman, Four Months after the Earthquake. *Arch Iran Med*. 2009;12((3):244-9.
35. Smigelsky MA, Aten JD, Gerberich S, Sanders M, Post R, Hook K, et al. Trauma in sub-Saharan Africa: Review of cost, estimation methods, and interventions. *International journal of emergency mental health*. 2013;16(2):354-65.
36. Brunnet AE BL, Weber JL, Kristensen CH. . Prevalence and factors associated with PTSD, anxiety and depression symptoms in Haitian migrants in southern Brazil. . *International Journal of Social Psychiatry*. 2018(0020764017737802).
37. Mugisha J, Muyinda H, Wandiembe P, Kinyanda E. Prevalence and factors associated with posttraumatic stress disorder seven years after the conflict in three districts in northern Uganda (The Wayo-Nero Study). *BMC psychiatry*. 2015;15(1):170.
38. Jenkins R, Othieno C, Omollo R, Ongeri L, Sifuna P, Mboroki JK, et al. Probable post traumatic stress disorder in Kenya and its associated risk factors: A cross-sectional household survey. *International journal of environmental research and public health*. 2015;12(10):13494-509.
39. Atwoli L, Stein DJ, Williams DR, Mclaughlin KA, Petukhova M, Kessler RC, et al. Trauma and posttraumatic stress disorder in South Africa: analysis from the South African Stress and Health Study. *BMC psychiatry*. 2013;13(1):182.
40. Pham PN WH, Longman T. . Trauma and PTSD Symptoms in Rwanda. *Jama* 2004;292(5):602.

- 1  
2  
3  
4  
5  
6  
7  
8  
9  
10  
11  
12  
13  
14  
15  
16  
17  
18  
19  
20  
21  
22  
23  
24  
25  
26  
27  
28  
29  
30  
31  
32  
33  
34  
35  
36  
37  
38  
39  
40  
41  
42  
43  
44  
45  
46  
47  
48  
49  
50  
51  
52  
53  
54  
55  
56  
57  
58  
59  
60
41. Karunakara UK, Neuner F, Schauer M, Singh K, Hill K, Elbert T, et al. Traumatic events and symptoms of post-traumatic stress disorder amongst Sudanese nationals, refugees and Ugandans in the West Nile. *African health sciences*. 2004;4(2):83-93.
42. Brewin CR, Andrews B, Valentine JD. Meta-analysis of risk factors for posttraumatic stress disorder in trauma-exposed adults. *Journal of consulting and clinical psychology*. 2000;68(5):748.
43. Besser A, Neria Y, Haynes M. Adult attachment, perceived stress, and PTSD among civilians exposed to ongoing terrorist attacks in Southern Israel. *Personality and Individual Differences*. 2009;47(8):851-7.
44. Song JY, Jeong K-S, Choi K-s, Kim M-g, Ahn Y-S. Psychological risk factors for posttraumatic stress disorder in workers after toxic chemical spill in Gumi, South Korea. *Workplace health & safety*. 2018:2165079917750168.
45. Lecic-Tosevski D, Pejuskovic B, Miladinovic T, Toskovic O, Priebe S. Posttraumatic stress disorder in a Serbian community: seven years after trauma exposure. *The Journal of nervous and mental disease*. 2013;201(12):1040-4.
46. Kaniasty K, Norris FH. Longitudinal linkages between perceived social support and posttraumatic stress symptoms: Sequential roles of social causation and social selection. *Journal of Traumatic Stress*. 2008;21(3):274-81.
47. M. G. The Posttraumatic Stress Disorder Checklist ( PCL ) PTSD CheckList – Civilian Version ( PCL-C *J Appl Clin Psychol*. 1993;2(8):323-55.
48. COHEN. Perceived Stress Scale. . 1983:7–8.
49. Motrico E, Moreno-Küstner B, de Dios Luna J, Torres-González F, King M, Nazareth I, et al. Psychometric properties of the List of Threatening Experiences—LTE and its association with psychosocial factors and mental disorders according to different scoring methods. *Journal of affective disorders*. 2013;150(3):931-40.
50. Dalgard OS. The Oslo 3-items social support scale. 20002.
51. Humeniuk R, Ali R, Babor TF, Farrell M, Formigoni ML, Jittiwutikarn J, et al. Validation of the alcohol, smoking and substance involvement screening test (ASSIST). *Addiction*. 2008;103(6):1039-47.

- 1  
2 52. Jaranson JM, Butcher J, Halcon L, Johnson DR, Robertson C, Savik K, et al. Somali and  
3 Oromo refugees: correlates of torture and trauma history. *American journal of public health*.  
4 2004;94(4):591-8.  
5  
6 53. Foa EB, Cashman L, Jaycox L, Perry K. The validation of a self-report measure of  
7 posttraumatic stress disorder: The Posttraumatic Diagnostic Scale. *Psychological assessment*.  
8 1997;9(4):445.  
9  
10 54. CLa. M. The History, Prevalence, and Measurement of Posttraumatic Stress Disorder. .  
11 *Behav Meas Lett*. 2017;12(2):5.  
12  
13 55. Heim C, Newport DJ, Heit S, Graham YP, Wilcox M, Bonsall R, et al. Pituitary-adrenal  
14 and autonomic responses to stress in women after sexual and physical abuse in childhood. *Jama*.  
15 2000;284(5):592-7.  
16  
17 56. Guay S, Billette V, Marchand A. Exploring the links between posttraumatic stress disorder  
18 and social support: Processes and potential research avenues. *Journal of Traumatic Stress: Official*  
19 *Publication of The International Society for Traumatic Stress Studies*. 2006;19(3):327-38.  
20  
21 57. Taylor S. *Clinician's guide to PTSD: A cognitive-behavioral approach*: Guilford  
22 Publications; 2017.  
23  
24  
25  
26  
27  
28  
29  
30  
31  
32  
33  
34  
35  
36  
37  
38  
39  
40  
41  
42  
43  
44  
45  
46  
47  
48  
49  
50  
51  
52  
53  
54  
55  
56  
57  
58  
59  
60

Table 4: Sociodemographic characteristics of study participants among residents of koshe area, Addis Ababa, Ethiopia, 2018 (n=830).

| Characteristics       | Frequency | Percentage |
|-----------------------|-----------|------------|
| Age                   |           |            |
| 15-40                 | 675       | 81.3       |
| >40                   | 155       | 18.7       |
| Sex                   |           |            |
| Female                | 491       | 59.2       |
| Male                  | 339       | 40.8       |
| Marital status        |           |            |
| Married               | 428       | 51.6       |
| Single                | 249       | 30%        |
| Divorced              | 131       | 15.8       |
| Others *              | 22        | 2.7        |
| Ethnicity             |           |            |
| Amhara                | 404       | 48.7       |
| Tigray                | 138       | 16.6       |
| Gurage                | 135       | 16.3       |
| Oromo                 | 123       | 14.8       |
| Others **             | 30        | 3.6        |
| Religion              |           |            |
| Orthodox              | 502       | 60.5       |
| Muslim                | 195       | 23.5       |
| Protestant            | 94        | 11.3       |
| Catholic              | 39        | 4.7        |
| Educational status    |           |            |
| Cannot read and write | 153       | 18.4       |
| Primary school        | 366       | 44.1       |
| Secondary school      | 185       | 22.3       |
| Diploma and above     | 126       | 15.2       |
| Occupational status   |           |            |
| House wife            | 131       | 15.8       |
| Employed              | 472       | 56.9       |
| Student               | 110       | 13.3       |
| Jobless               | 117       | 14         |

NB: others \* separated, widowed

Others\*\* Silte, Hadya

1  
2 List of figures  
3

4 Fi 1: Showing the distribution of substance-related factors of the respondents in koshe Addis  
5 Ababa, Ethiopia, 2018 (n=830)  
6  
7

8 Fig 2: Showing prevalence of PTSD among residents of koshe, Addis Ababa, Ethiopia, 2018  
9 (n=830)  
10  
11  
12  
13  
14  
15  
16  
17  
18  
19  
20  
21  
22  
23  
24  
25  
26  
27  
28  
29  
30  
31  
32  
33  
34  
35  
36  
37  
38  
39  
40  
41  
42  
43  
44  
45  
46  
47  
48  
49  
50  
51  
52  
53  
54  
55  
56  
57  
58  
59  
60

For peer review only

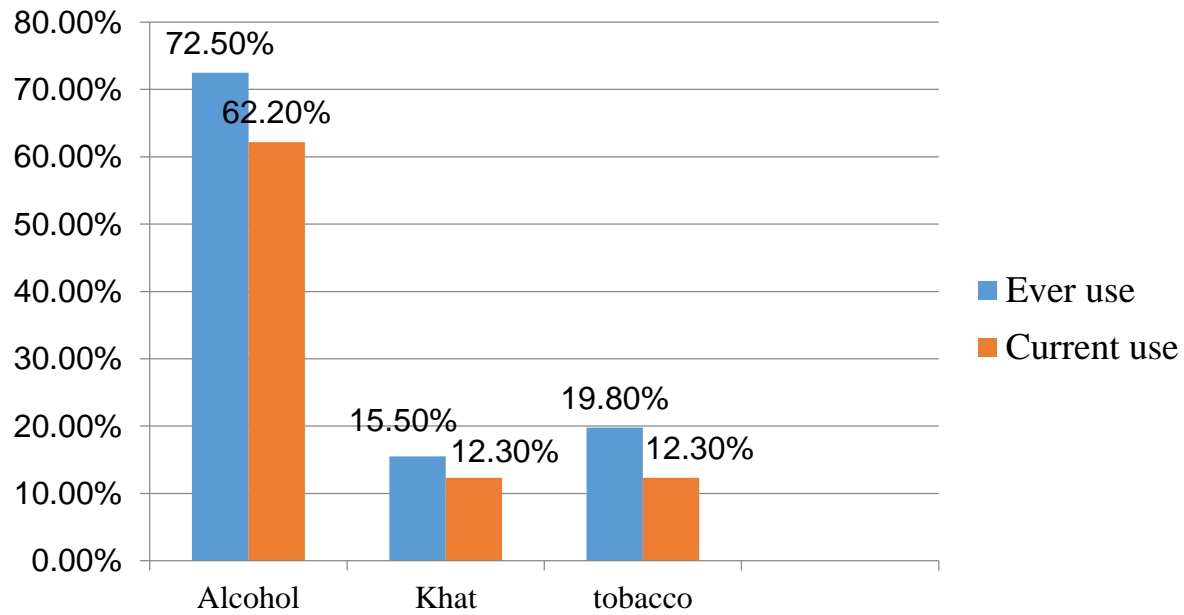



1  
2  
3  
4  
5  
6  
7  
8  
9  
10  
11  
12  
13  
14  
15  
16  
17  
18  
19  
20  
21  
22  
23  
24  
25  
26  
27  
28  
29  
30  
31  
32  
33  
34  
35  
36  
37  
38  
39  
40  
41  
42  
43  
44  
45  
46  
47  
48  
49  
50  
51  
52  
53  
54  
55  
56  
57  
58  
59  
60

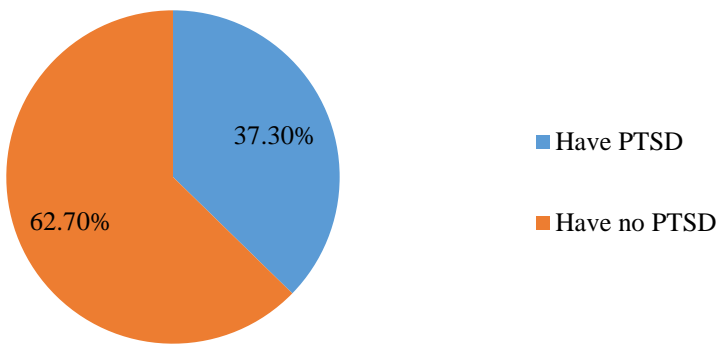

For peer review only

# BMJ Open

**Prevalence and associated factors of post-traumatic stress disorder among Koshe landslide survivors, Addis Ababa Ethiopia: community-based, cross-sectional study**

|                                 |                                                                                                                                                                                                                                                                                     |
|---------------------------------|-------------------------------------------------------------------------------------------------------------------------------------------------------------------------------------------------------------------------------------------------------------------------------------|
| Journal:                        | <i>BMJ Open</i>                                                                                                                                                                                                                                                                     |
| Manuscript ID                   | bmjopen-2018-028550.R1                                                                                                                                                                                                                                                              |
| Article Type:                   | Research                                                                                                                                                                                                                                                                            |
| Date Submitted by the Author:   | 30-Mar-2019                                                                                                                                                                                                                                                                         |
| Complete List of Authors:       | Asnakew, Sintayehu ; Debretabor University, Psychiatry shumet, shegaye; University of Gondar, psychiatry Ginbare , Worknesh ; Amanuel mental specialized hospital, Psychiatry Legas, Getasew ; Debretabor university, Psychiatry Haile , Kalkidan ; Dbremarkos hospital, psychiatry |
| <b>Primary Subject Heading</b>: | Mental health                                                                                                                                                                                                                                                                       |
| Secondary Subject Heading:      | Public health                                                                                                                                                                                                                                                                       |
| Keywords:                       | Koshe landslides, post-traumatic stress disorder, Ethiopia, Addis Ababa                                                                                                                                                                                                             |
|                                 |                                                                                                                                                                                                                                                                                     |

SCHOLARONE™  
Manuscripts

1  
2  
3  
4  
5  
6  
7  
8  
9  
10  
11  
12

## **Prevalence and associated factors of post-traumatic stress disorder among Koshe landslide survivors, Addis Ababa Ethiopia: community-based, cross- sectional study**

13  
14  
15  
16  
17  
18  
19  
20  
21  
22  
23  
24  
25

Sintayehu Asnakew<sup>1\*</sup> Shegaye Shumet<sup>2</sup>, Worknesh Ginbare <sup>3</sup>, Getasew Legas <sup>1</sup>Kalkidan Haile <sup>4</sup>

26  
27  
28  
29  
30  
31  
32  
33  
34  
35  
36  
37

<sup>1</sup> Department of Psychiatry, College Health Sciences, Debretabor University, Debretabor, Ethiopia

38  
39  
40  
41  
42  
43  
44  
45  
46  
47  
48  
49  
50  
51  
52  
53  
54  
55  
56  
57  
58  
59  
60

<sup>2</sup>Department of psychiatry, School of medicine, College of Medicine and Health Sciences, University of Gondar, Gondar, Ethiopia

<sup>3</sup> Department of psychiatry, Amanuel mental specialized hospital, Addis Ababa, Ethiopia

<sup>4</sup>Department of psychiatry, Debre markos hospital, Debre markos, Ethiopia

SA1: [sintie579@gmail.com](mailto:sintie579@gmail.com)

SS: [shumetshegaye@yahoo.com](mailto:shumetshegaye@yahoo.com)

WG: [workneshginbare@gmail.com](mailto:workneshginbare@gmail.com)

GL: [getasewlegas@gmail.com](mailto:getasewlegas@gmail.com)

KH: [kalkidan946@gmail.com](mailto:kalkidan946@gmail.com)

\*Corresponding Author. Shegaye shumet

Department of psychiatry, university of Gondar, Gondar, Ethiopia

. Tel.:+251918045505/+251967148362 Email: [shumetshegaye@yahoo.com](mailto:shumetshegaye@yahoo.com)

## Abstract

**Objectives:** To assess the prevalence of post-traumatic stress disorder and associated factors among survivors of Koshe landslide, Addis Ababa, Ethiopia, 2018.

**Design:** Community based, cross-sectional study design.

**Setting:** Koshe landslide, Addis Ababa, Ethiopia.

**Participants:** We recruited about 830 participants using simple random sampling method for an interview during the study period.

**Measurement:** Data were collected by face-to-face interview. Post-traumatic stress disorder was measured using post-traumatic stress disorder checklist-civilian version. Perceived Stress Scale (PSS) and Oslo-3 social support were instruments used to assess the associated factors. Coded variables were entered into Epi data version 4.2 then exported to SPSS version 24 for analysis. Bivariate and multivariate binary logistic regressions with odds ratio and 95% confidence interval were employed.

**Result:** A total of 830 participants were interviewed, resulting in a response rate of 98.2% for the study. The prevalence of post-traumatic stress disorder was 37.3 % with ( 95 % CI: 34.1, 40.8). In the multivariate logistic regression; being female (AOR=1.74, 95%CI; 1.21,2.50), divorced (AOR=2.08,95%CI; 1.26,3.43), sustained physical injury(AOR=8.28,95%CI; 5.04,13.61) , history of mental illness ( AOR = 5.55 , 95% CI ; 2.30 , 13.36 ) , family history of mental illness ( AOR = 2.82 , 95 %CI ; 1.48 , 5.37 ) , poor social support ( AOR = 3.64 , 95 %CI ; 1.99 , 6.69 ) , and high perceived stress ( AOR = 3.08 , 95 CI , 1.43 , 6.64 ) were associated with post-traumatic stress disorder.

**Conclusion and recommendation:** The prevalence of post-traumatic stress disorder among survivors of Koshe landslide was high. We recommend a PTSD-focused early regular screening by trained health professionals and considering linkage with mental health service providers is beneficial.

### Strengths and limitations of the study

The limitation of the study emanates from its cross-sectional design, which may have only partially accounted for durable temporal relationships.

Social and recall biases might have occurred among subjects while completing the questionnaire.

PTSD Checklist–Civilian Version scale in the current study can be used as a reference in subsequent studies since it has good internal consistency.

**Keywords:** Koshe landslides, post-traumatic stress disorder

## Introduction

Posttraumatic stress disorder is a mental disorder that follows a traumatic event in which the individual experienced, witnessed, or was confronted with either actual or threatened loss of life or serious injury resulting a response of fear, helplessness, or horror(1). In order to be diagnosed with PTSD, a person must have re-experiencing of the trauma, avoidance of trauma-related stimuli, excessive arousal, and negative alterations in cognition and mood and that must occur 1 month after the event(2). A disaster is a traumatic event that is experienced by many people and causes different mental and physical health consequences(3). A survey study conducted in US residents, 13% of the sample reported a lifetime exposure to natural or human-generated disaster(4). According to several studies undertaken among adults, there was an increased psychological distress after natural disasters(5). Although the consequences of disasters may include a wide range of psychopathology, a systematic review has acknowledged that PTSD is the most commonly studied and frequently occurred psychopathology following disasters(6).

About 8 million adults have PTSD during a given year worldwide(7). Over fifty-one million people are being forcibly displaced worldwide, of whom 16.7 million are displaced outside their home countries and this may lead to a stress-related disorder(8). According to the global burden of disease report, about 14% of the disease burden has been attributed to neuropsychiatric disorders, mostly due to long term disabling nature of depression, and other common mental disorders including PTSD(9). Post-traumatic stress disorder (PTSD) was estimated to account for 0.4% of total YLD, around the same percentage as schizophrenia. According to World Health Report 2001, the estimated burden of PTSD has increased to 0.6% YLD globally (10). Data in USA showed the lifetime prevalence of PTSD was 8 % in the general population. The lifetime prevalence rate was 10 % in women and 4 % in men(11). Study among Israeli residents age 18 years and above who were exposed to terrorism, the prevalence of PTSD was 9.4%, with higher rates among women (16.2%) than men (2.4%)(12). The global economic burden of stress-related mental illness is expected to rise in the coming decade. The world health organization global disease of burden study estimates that mental illness, including stress-related disorder, will be the second leading cause of disability by the year 2020(13).

1  
2 The prevalence rate of PTSD in developing countries is higher as compared with in the developed  
3 countries. A study conducted among a geographically diverse sample of Mexican adults, the  
4 prevalence of PTSD was estimated to be 19%(14). Different studies in Africa showed that PTSD  
5 can still be a public health concern several years after the civil conflict and post-disaster setting.  
6 Reviews of community-based study in South Africa showed that trauma exposure is higher in low-  
7 income countries compared with high-income countries(15). Another study in Uganda during an  
8 active conflict period showed that PTSD prevalence varied between 18% and 54 % in the general  
9 population (16).

10  
11 PTSD is a public health issue that contributes for poverty, lack of employment, unsecured living  
12 circumstance, change in the social network and highly associated with lower quality of life (QOL)  
13 even after the end of the actual hostility and post-disaster setting (17, 18). Factors that contribute  
14 for the development of post-traumatic stress disorder have been classified into pre-existing factors  
15 like a family history of mental illness, and substance history, the traumatic event itself, post-  
16 trauma factors such as social support (19).

17  
18 There was the occurrence of garbage landslide in Addis Ababa, Ethiopia, at the area of Koshe. It  
19 is a vast rubbish dump on the outskirts of Addis Ababa, capital city of Ethiopia. Even though  
20 landslide is sometimes happened in Ethiopia but garbage land slide is rare incident. The landslide  
21 had a major impact on these community in terms of housing, financial, work and family problems  
22 resulting from the event(20). Many people were dead and dozens injured after the disaster.  
23 Hundreds of people attempt to make a living at the landfill site by collecting items for sell. Some  
24 people even lived around at the rubbish dump permanently. Natural disasters including land slide  
25 have a negative impact on mental health of affected individuals(21). Post-traumatic stress disorder  
26 is the most common psychopathology and important public health matter after experiencing  
27 trauma/disaster.

28  
29 Even though PTSD is highly prevalent among post-disaster setting, there are no studies which  
30 shows the prevalence of PTSD among survivors of Koshe landslide Addis Ababa, Ethiopia. So  
31 determining prevalence of PTSD and associated factors among survivors of Koshe landslide Addis  
32 Ababa is important for early intervention and further decrease the burden of PTSD and contribute  
33 to have a plane for improving victims' quality of life.

## Objective

This study set out to assess the prevalence of post-traumatic stress disorder and associated factors among survivors of Koshe landslide Addis Ababa, Ethiopia, 2018.

## Methods and materials

### Study settings and period

A community based, cross-sectional study was conducted between May to June 2018. The study was conducted at Koshe, a large open landfill which receives rubbish and waste from Addis Ababa, capital city of Ethiopia. This landfill is located in the southwestern part of Addis Ababa within boundaries of Nefas Silk-Lafto and Kolfie (Sub cities of Addis Ababa). The area has been a dumping ground for Addis Ababa's rubbish for more than five decades. The landfill hosts hundreds of rubbish pickers who sell recovered materials from the waste. Some people even live around at the rubbish dumping permanently.

### Study participants and sampling

We used multistage sampling technique to select 830 participants. To reach the households simple random sampling technique was used (computer-generated random number). We proportionally allocated the sample size to Kilinto, Asko, Addis Hiwot and Koshe garbage dump area, where victims' temporary settle. Members of the selected household were further selected for an interview. In case of more than one eligible participant in the household, lottery method was used to select only one.

The study included all participants whose age 15 years and above during data collection period at the study area. In total, there were 5316 population. Nearly, 1035 were households. We excluded those participants who were seriously ill and unable to communicate.

### Sample size determination

In this study, we determined the sample size by using a single population proportion formula with the following assumptions: by taking 48% prevalence of post-traumatic stress disorder from results conducted in South Sudan(22), which was  $P=0.48$ .  $Z$  (standard normal distribution: 1.96) was assumed and CI was set at 95% (and  $\alpha=0.05$ ); and a non-response rate of 10%. Accordingly, a representative/probabilistic sample size of the study was calculated to be 423. After considering design effect, the total sample size was decided to be 846.

## Study variables

The dependent variable PTSD was measured as a dichotomous variable (yes/no) on 17 items of PTSD checklist-Civilian version, with the cut-off point set at greater than or equal to 50, that is, garbage slide victims who scored  $\geq 50$  had PTSD.

Independent variables include sociodemographic factors (age, sex, marital status, ethnicity, religion, educational status and occupational status), clinical variables (family history of mental illness, previous history of mental illness and experiencing childhood trauma), traumatic related factors (trauma exposure, perceived life threat), substance related factors (alcohol consumption, cigarette smoking, Khat chewing) and psychosocial factors (social support, stressful life events).

## Data sources and measurement

Data were collected via a face-to-face interview using semi structured questionnaire. Data were collected by four trained data collectors (psychiatry nurses) using the Amharic version of the questionnaire for a month. The questionnaire was designed in English and was translated to Amharic, national language of Ethiopia and back to English for its consistency. The training was given for data collectors regarding to the questionnaire such as how to interview and explain unclear questions, purpose of the study for participants. Furthermore, they have given awareness about ethical principles including confidentiality/ anonymity/ and data management, secure subjects' informed consent for participation.

**Post-traumatic stress disorder Checklist-Civilian version (PCL-C)** was used to assess post-traumatic stress disorder. PCL-C is measured with likert type scale ranging from ( 1) "Not at all" to (5) "Extremely" with a cut point of  $\geq 50$ . It had shown high internal consistency and reliability and strong correlation with PTSD diagnosis using clinician-administered PTSD scale translated versions of the PCL-C into Oromo and Somali produced high reliability with cronbach's  $\alpha$  (.93)(23) and has 0.89 sensitivity and 0.75 specificity(24). In the current study, the inter-data reliability or internal consistency was found to be Cronbach's  $\alpha$  (0.94).

**Social support** was measured using Oslo 3-items, social support scale and with scores ranging between 3 and 14: 3–8=poor social support; 9–11=intermediate social support; and 12–14=strong social support (25).



1  
2 **Individual stress levels** were measured using the Perceived Stress Scale (PSS). The questions in  
3 this scale ask about their feelings and thoughts during the last month. PSS is measured with likert  
4 type scale ranging from ( 0) “Never” to (4) “very often ” and individuals with higher scores  
5 indicating higher perceived stress(26).  
6  
7

8  
9 **Substance use history:** To examine substance use history, respondents were asked: “Have you ever  
10 use any substance in the last three months or in lifetime?” and the responses were yes/no (27).  
11

12 **History of mental illness:** To examine history of mental illness, respondents were asked: “Have you  
13 ever been diagnose with mental illness and treated previously” and responses were yes/no.  
14

15  
16 **Family history of mental illness:** To examine family history of mental illness, respondents were  
17 asked: “Do you know a family member who had experienced a mental illness?”  
18

19 **Experiencing childhood trauma:** To examine child hood trauma, respondents were asked: “Have  
20 you been experienced childhood physical and sexual abuse and neglect” and responses were  
21 yes/no.  
22

23  
24 **Items on socio-demographic factors** (age, sex, ethnicity, religion, marital status, educational status  
25 and occupational status) were adopted from different literatures.  
26  
27

### 28 **Data processing and analysis**

29 All collected data were checked for completeness and consistency and entered in to Epi-data  
30 version 4.2 and then exported to SPSS for windows version 24 for analysis.  
31

32 We computed descriptive and bivariate and multivariate logistic regression analyses to see  
33 frequency distribution and to test whether there were an association between the independent and  
34 dependent variables, respectively. Factors associated with PTSD were selected during bivariate  
35 analysis with a value of  $p \leq 0.05$  for further analysis in multivariable regression analysis. In  
36 multivariable regression analysis variables with P-value less than 0.05 at 95% confidence interval  
37 with its adjusted odds ratio were considered as statistically significant.  
38  
39

### 40 **Ethical Consideration**

41  
42 Ethical approval was obtained ethical review board of the University of Gondar. Ethical clearance  
43 was obtained from joint ethical review committees of the University of Gondar and Amanuel  
44 mental specialized hospital. Permission was obtained from Addis Ababa city Administration  
45 health bureau ethical committee. We took written consent from study participants and assent from  
46 legally approved foster parents after explaining purpose of the study. Confidentiality was  
47 maintained by omitting their personal identification.  
48  
49  
50  
51  
52  
53  
54  
55

## Patient and public involvement

In the current study our study participants are people who survive at Koshe landslide, Addis, Ababa, Ethiopia, and patients were not included in this study. Our study participants were also not involved in the study design and recruitment. The results of this study will be disseminated to Federal Ministry of Health, Addis Ababa health bureau, and Kolfe sub city health department for timely management of those survivors through presentation and policy briefing.

## Result

A total of 830 respondents were participated in the study with the response rate of 98.2%. Majority of the respondents, 491 (59.2%) were female. The mean age of the respondents was 33(SD  $\pm$ 12 ) years, of whom 675 (81.3%) were in the age range of 15-40 years. Approximately, 428(51.6%) respondents were married, 502 (60.5%) Orthodox Christian followers and 404 (48.7%) Amhara by ethnicity. Regarding to their occupation, more than half (56.6%) were employed (**table1**).

Table 1: Sociodemographic characteristics of study participants among residents of Koshe area, Addis Ababa, Ethiopia, 2018 (n=830).

| Characteristics | Frequency | Percentage |
|-----------------|-----------|------------|
| Age             |           |            |
| 15-40           | 675       | 81.3       |
| >40             | 155       | 18.7       |
| Sex             |           |            |
| Female          | 491       | 59.2       |
| Male            | 339       | 40.8       |
| Marital status  |           |            |
| Married         | 428       | 51.6       |
| Single          | 249       | 30.0       |
| Divorced        | 131       | 15.8       |
| Others *        | 22        | 2.7        |
| Ethnicity       |           |            |
| Amhara          | 404       | 48.7       |
| Tigray          | 138       | 16.6       |
| Gurage          | 135       | 16.3       |
| Oromo           | 123       | 14.8       |
| Others **       | 30        | 3.6        |

|                       |     |      |
|-----------------------|-----|------|
| Religion              |     |      |
| Orthodox              | 502 | 60.5 |
| Muslim                | 195 | 23.5 |
| Protestant            | 94  | 11.3 |
| Catholic              | 39  | 4.7  |
| Educational status    |     |      |
| Cannot read and write | 153 | 18.4 |
| Primary school        | 366 | 44.1 |
| Secondary school      | 185 | 22.3 |
| Diploma and above     | 126 | 15.2 |
| Occupational status   |     |      |
| House wife            | 131 | 15.8 |
| Employed              | 472 | 56.9 |
| Student               | 110 | 13.3 |
| Jobless               | 117 | 14.0 |

NB: others \* separated, widowed, others\*\* Silte, Hadya

About 55(6.6%) of participants had a history of mental illness. Around 202 (24.3%) of them had childhood physical abuse and neglect experience, and seventy-nine (9.5%) of them had family history of mental illness.

Nearly, 569 (68.6%) of the respondents had witnessed physical injury of their families or friends, and about 166 (20%) had experienced physical injury and 581 (70 %) of the participants had moderate perceived life threat (**table 2**).

**Table 2:** Distribution of trauma-related factors of the respondents in Koshe, Addis Ababa, Ethiopia, 2018 (n=830)

| Characteristics                                   | Frequency | Percentage |
|---------------------------------------------------|-----------|------------|
| Sustaining physical injury                        | 166       | 20.0       |
| Witnessing the death of families or friends       | 526       | 63.4       |
| Witnessing physical injury of families or friends | 569       | 68.6       |
| Property destruction                              | 240       | 28.9       |
| Thinking, they may die                            | 546       | 65.8       |
| Perceived life threat                             |           |            |
| Low perceived stress                              | 185       | 22.3       |

|                           |     |      |
|---------------------------|-----|------|
| Moderate perceived stress | 581 | 70.0 |
| High perceived stress     | 64  | 7.7  |

Out of the total 830 participants, nearly half (48%) of the respondents had poor social support and majority 659(79.4%) of the participants had experienced at least one stressful life events (**table 3**).

**Table 3:** Distribution of psychosocial factors of the study participants among residents of Koshe Addis Ababa, Ethiopia, 2018(n= 83)

| Characteristics              | Category | Frequency | percent |
|------------------------------|----------|-----------|---------|
| <b>Social support</b>        | Poor     | 398       | 48.0    |
|                              | Moderate | 324       | 39.0    |
|                              | Strong   | 108       | 13.0    |
| <b>Stressful life events</b> | Yes      | 659       | 79.4    |
|                              | No       | 171       | 20.6    |

On substance-related factors, nearly three fourth, 602(**72.5%**) of the participants had ever use of alcohol, and 516(62.20%) current use of alcohol. Regarding to tobacco smoking, 164(19.80%) of the participants had ever used, and 102(12.30%) current use of tobacco. Concerning khat chewing (leaves of khat), about 129(15.5%) ever use and 102(12.30%) current use of khat.

### Prevalence of PTSD

In our finding the prevalence of post-traumatic stress disorder (PTSD) among study participants was 37.3% (95 % CI: 34.1, 40.8) (**Fig1**).

### Factors associated with posttraumatic stress disorder

To determine the association of independent variables with PTSD, bivariate and multivariate binary logistic regression analysis were carried out.

In the bivariate analysis factors including being female, age >60 years , divorced in marital status, history of mental illness, family history of mental illness, experiencing childhood physical trauma and neglect, sustained physical injury, witnessing the death and physical injury of families or friends, property destruction, thought, they may die, poor social support, and high perceived life threat were significantly associated with post-

traumatic stress disorder at a P value less than 0.05. These factors were then entered into multivariable logistic regression model to control for its confounding effects.

The result of the multivariate analysis showed that being female, being divorced, history of mental illness, family history of mental illness, sustained physical injury, poor social support and high perceived life threat were significantly associated with PTSD at a p-value less than 0.05. Being female was 1.7 times more likely to develop PTSD as compared with male respondents (AOR=1.7,95 %CI; 1.2,2.5).The odds of developing PTSD were 2.1 times higher among respondents who were divorced as compared with those respondents who were married (AOR=2.1,95%CI;1.3,3.4). On history of mental illness, the odds of developing PTSD were 5.6 times higher among participants who had history of mental illness as compared with those who had no history of mental illness (AOR=5.6,95% CI,2.3,13.4). The likelihood of developing PTSD was 2.8 times higher among respondents who had family history of mental illness as compared with those who had no family history of mental illness (AOR=2.8, 95% CI, 1.5, 5.4).The odds of developing PTSD were 8.3 times higher among respondents who had experienced physical injury than those who hadn't experienced physical injury (AOR=8.3, 95% CI, 5.0, 13.6). Respondents who had poor social support were 3.6 times more likely to develop PTSD as compared with those participants who had strong social support( AOR= 3.6,95% CI,2.0,6.7).The odds of developing PTSD were 3.1 times higher among those respondents who had high perceived stress than those who had low perceived stress (AOR= 3.1, 95% CI;1.4,6.6) (**Table 4**).

**Table 4:** Factors associated with PTSD among residents of Koshe, Addis Ababa, Ethiopia, 2018 (n= 830)

| Variables      | Category | PTSD |     | COR(95%CI)   | AOR(95%CI)     |
|----------------|----------|------|-----|--------------|----------------|
|                |          | Yes  | No  |              |                |
| Sex            | Male     | 106  | 233 | 1            | 1              |
|                | Female   | 204  | 287 | 1.6(1.2,2.1) | 1.7(1.2,2.5)** |
| Age            | 15-40    | 241  | 434 | 1            | 1              |
|                | >40      | 69   | 86  | 1.5(1.0,2.1) | 1.4(0.9,2.1)   |
| Marital status | Married  | 138  | 290 | 1            | 1              |
|                | Single   | 87   | 162 | 1.1(0.8,1.6) | 1.2(0.8,1.8)   |
|                | Divorced | 77   | 54  | 3.0(2.0,4.5) | 2.1(1.3,3.4)** |
|                | Others   | 8    | 14  | 1.2(0.5,2.9) | 1.4(0.5,4.2)   |

|                                          |          |     |     |                |                 |
|------------------------------------------|----------|-----|-----|----------------|-----------------|
| History(Hx) of mental illness            | Yes      | 46  | 9   | 9.9(4.8,20.5)  | 5.6(2.3,13.4)** |
|                                          | No       | 264 | 511 | 1              | 1               |
| Family Hx of mental illness              | Yes      | 55  | 24  | 4.5(2.7,7.4)   | 2.8(1.5,5.4)**  |
|                                          | No       | 255 | 496 | 1              | 1               |
| Experiencing childhood trauma            | Yes      | 109 | 93  | 2.5(1.8,3.4)   | 1.2(0.7,1.9)    |
|                                          | No       | 201 | 427 | 1              | 1               |
| Sustaining Physical trauma               | Yes      | 135 | 31  | 12.2(7.9,18.7) | 8.3(5.0,13.6)** |
|                                          | No       | 175 | 489 | 1              | 1               |
| Witnessing the death of family or friend | yes      | 223 | 303 | 1.9(1.4,2.5)   | 0.8(0.5,1.4)    |
|                                          | No       | 87  | 217 | 1              | 1               |
| Witnessing injury of family or friend    | Yes      | 238 | 331 | 1.9(1.4,2.6)   | 0.8(0.5,1.4)    |
|                                          | No       | 2   | 189 | 1              | 1               |
| Property destruction                     | Yes      | 117 | 123 | 2.0(1.4,2.7)   | 1.0(0.7,1.5)    |
|                                          | No       | 193 | 397 | 1              | 1               |
| Thought of death                         | Yes      | 242 | 304 | 2.5(1.8,3.5)   | 1.3(0.7,2.0)    |
|                                          | No       | 68  | 216 | 1              | 1               |
| Social support                           | poor     | 209 | 189 | 4.9(2.9,8.2)   | 3.6(2.0,6.7)**  |
|                                          | Moderate | 81  | 243 | 1.5(0.9,2.5)   | 1.4(0.8,2.6)    |
|                                          | Strong   | 20  | 88  | 1              | 1               |
| Perceived threat                         | Low      | 56  | 129 | 1              | 1               |
|                                          | Moderate | 209 | 372 | 2.9(1.9,4.6)   | 1.0(0.7,1.6)    |
|                                          | High     | 45  | 19  | 10.9(5.6,21.4) | 3.1(1.4,6.6)**  |

key:\*\*=p-value<0.05,Model fitness=0.114 (hosmer and lemshow),=0.000(Omnibus test), no multicollinearity (tolerance>0.1 and VIF<2)

## Discussion

Post-traumatic stress disorder is the most common psychopathology and important public health matter after experiencing trauma/disaster. We found that, for the entire sample, a garbage landslide has a negative impact on exposed individuals' mental health and in terms of housing, financial, work and family problems resulting from the event. This study found a number of people met the criteria for post trauma stress symptomatology. Approximately, 37.3% of people who experienced the incident have presented with posttraumatic stress disorder symptoms based on post-traumatic stress disorder checklist-civilian version. Our finding was consistent with reports in other studies on populations exposed to natural disasters, which were 36.3% among earth quick victims in Kerman, 35.4% among Syrian refugees in Lebanon, 34.9% in turkey, 34.3% among bombing victims of the Oklahoma city, USA (8, 28-30). Conversely, this finding was lower than 48% found

1  
2 in South Sudan, 75.6% among Rana Plaza building collapse victims in Bangladesh, 57% in Saudi  
3 Arabia, 83.7%, former Yugoslavia living in Croatia, Serbia, Germany and U.K, 59.4% in  
4 Fukushima nuclear disaster Japan (18, 22, 31-33). The possible reason for this difference might be  
5 due to use of different instruments and cutoff points to measure PTSD, exposure to multiple  
6 trauma, study design and the nature and magnitude of the accidents covered in the study.  
7

8  
9 On the other hand, our estimations are higher than findings in other countries, which were 11.8%  
10 in Northern Uganda, 18.8% in Serbia, 29.3% in Southern Lebanon, 9.1% in Southern Brazil (34-  
11 37). The possible reason for this variation might be instrument difference. They were using GHQ-  
12 12, structured clinical interview, MINI, the modified version of a composite international  
13 diagnostic interview but we used post-traumatic stress disorder checklist civilian version. The  
14 other variation might be due to the methods they used for data collection (structured telephone  
15 interview) and delayed conduction of the study after the trauma.  
16  
17

18  
19 On the independent predictors of PTSD, being female, being divorced, history of mental illness,  
20 family history of mental illness, sustained physical injury, poor social support and high perceived  
21 life threat were significantly associated with PTSD. Specifically, the greater likelihood of PTSD  
22 occurrence among female gender as compared with male respondents, which is similar with other  
23 studies (28, 30, 31, 38-40), which is possibly due to females have experienced sexual assault and  
24 child sexual abuse than males, hence being exposed to such trauma is more risk than other trauma  
25 in causing PTSD(41).  
26  
27

28  
29 Participants who were divorced were more likely to develop PTSD as compared with  
30 married respondents. Those with younger children might have concerns often center on  
31 raising their family alone, financial worries tend to fill the minds of most people facing life  
32 without their partner, especially those with young children which leads to be stressed. This  
33 was supported by study in Serbia(35).  
34  
35

36  
37 Having the history of mental illness was also significantly associated with PTSD.  
38 Participants with the history of mental illness might have neurochemical imbalance and  
39 neuronal damage as compared to those who had no history of mental illness. As a result  
40 they might prone to develop PTSD after this phenomenon. This finding was supported by  
41 results of studies conducted in various country (30, 33, 38, 42, 43).  
42  
43  
44  
45  
46  
47  
48  
49  
50  
51  
52  
53  
54  
55  
56



1  
2 The odds of developing PTSD was 2.8 times higher among respondents who had a family  
3 history of mental illness than those who had no family history of mental illness. The possible  
4 explanation might be the inheritance of the serotonin transporter gene as well as genes  
5 associated with the hypothalamic–pituitary–adrenal axis and psychological factors which  
6 made participants more highly predispose to PTSD (41, 44). This finding was consistent  
7 with results of studies conducted in South Korea(42, 43).  
8  
9  
10  
11

12  
13 Moreover, experiencing physical injury was the strongest predictor of PTSD as compared  
14 with those individuals who didn't experience physical injury during the catastrophe which  
15 is similar with results from other studies (28, 31, 40). The possible explanation for the  
16 similarity could be the presence of scars, having impaired part may remind the trauma and  
17 relive it and may believe that the traumatic event has been put behind them, the body could  
18 be clinging to unresolved issues. The odds of developing PTSD was 3.6 times higher among  
19 individuals who had poor social support than strong social support which is similar with  
20 results of studies conducted in Southern Brazil and Mexico (37, 45). Lack of help with  
21 physical exercise, emotional support and having someone to talk with about traumatic  
22 experience or to turn to for advice could increase the risk of PTSD(46).  
23  
24  
25  
26  
27  
28  
29  
30

31 Participants who had high perceived stress were more likely to develop PTSD as compared with  
32 those respondents who had low perceived stress which is similar with findings from Southern  
33 Israel and Southern Korea(42, 47). The negative belief towards the consequence of ongoing threat  
34 as damaging implications will precipitate the onset and persistence of PTSD(48).  
35  
36  
37  
38  
39

### 40 **Limitation of the study**

41 The design of the study was cross-sectional; therefore, we were unable to conclude the  
42 observed/reported associations may not necessarily any causal direction.  
43

44 In addition, participants did not consider whether or not they have post-traumatic stress disorder  
45 before the onset of landslide due to other factors. The presence of post-traumatic stress disorder  
46 symptoms before this catastrophe may influence prevalence of post-traumatic stress disorder due  
47 garbage land slide.  
48  
49  
50

51 Furthermore, social desirability and recall bias might also be the other limitations. Since data  
52 collection method was face-to-face interview which might lead individuals to respond socially  
53 acceptable answer during the interview process especially in case of substance-related questions.  
54  
55  
56



1  
2 Individuals without PTSD symptoms may have less motivation to recall earlier exposure as  
3 compared with individuals with PTSD symptoms.  
4

5  
6 In addition to this, we did not consider other mental health problems that can confound study  
7 outcomes. For instance, the presence and effects of anxiety and depression symptoms, which are  
8 commonly associated with PTSD symptoms and severity of PTSD, duration of mental illness, or  
9 exposure to other diseases were not covered in the study.  
10  
11

12  
13 The strength of the study was including a relatively large sample size and sampling methods.  
14 Since it was face-to-face interview, we were addressing individuals who had PTSD for further  
15 investigation and intervention.  
16  
17

## 18 **Conclusion**

19  
20 The prevalence of PTSD was found to be high. This study confirms the negative impact of a  
21 garbage landslide on the mental health of affected individuals. Being female, divorced participants,  
22 history of mental illness, family history of mental illness, sustained physical injury, poor social  
23 support and high perceived life threat were significantly associated with PTSD. Therefore; we  
24 recommend a PTSD-focused early regular screening by trained health professionals and  
25 considering linkage with mental health service providers is beneficial. It is also better to give  
26 emphasis for individuals with a family history of mental illness, female gender, and a history of  
27 mental illness and for those who experienced physical trauma during the disaster.  
28  
29

## 30 **Lists of abbreviations**

31  
32 AMSH: Amanuel Mental Specialized Hospital; AOR: Adjusted Odd Ratio, CI: Confidence  
33 Interval; COR: Crude Odd Ratio; DSM: Diagnostic and Statistical Manual; HH: House Hold;  
34 M.I.N.I: Mini-International Neuropsychiatric Interview ; OSS-3: Oslo 3 Items Social Support  
35 Scale; PCL-C: Post Traumatic Stress Disorder Civilian Version; PTSD: Post Traumatic Stress  
36 Disorder; QOL: Quality Of Life; SPSS: Statistical Package for Social Science; U.S: United  
37 States; UOG: University Of Gondar; WHO: World Health Organization  
38  
39  
40  
41  
42  
43  
44  
45  
46

## 47 **Acknowledgment**

48  
49 The authors acknowledge the University of Gondar and Amanuel Mental Specialized Hospital for  
50 funding the study. We extend our gratitude to data collectors, supervisors and study participants  
51 for their time and effort.  
52  
53  
54  
55

**Authors' contribution:** SA developed the proposal, supervised the data collection, analyzed the data and wrote the draft manuscript. WG, GL, KH revised the proposal, checked the data analysis. SS, revised the proposal, check data analysis, revised and approved the manuscript.

**Funding:** The authors have not declared a specific grant for this research from any funding agency in the public, commercial or not-for-profit sectors. The funder has no role in collection, analysis and interpretation of data and in writing the manuscript

**Competing interests:** None declared

**Patient consent:** Informed consent was obtained from participants

**Ethical approval and consent to participate:** Ethical approval was obtained from Ethical review board of the University of Gondar. Ethical clearance was obtained from joint ethical review committees of the University of Gondar and Amanuel mental specialized hospital. A formal letter of permission obtained and submitted to the respective town administration.

**Provenance and peer review:** Not commissioned; externally peer reviewed.

**Data sharing statement:** The data set is available on request by emailing the corresponding author at [shumetshegaye@yahoo.com](mailto:shumetshegaye@yahoo.com)

**Consent to publication:** Not applicable

## References

1. Heinrichs M, Wagner D, Schoch W, Soravia LM, Hellhammer DH, Ehlert U. Predicting posttraumatic stress symptoms from pretraumatic risk factors: a 2-year prospective follow-up study in firefighters. *American Journal of Psychiatry*. 2005;162(12):2276-86.
2. Association AP. *Diagnostic and statistical manual of mental disorders (DSM-5®)*: American Psychiatric Pub; 2013.
3. Norris FH, Friedman MJ, Watson PJ, Byrne CM, Diaz E, Kaniasty K. 60,000 disaster victims speak: Part I. An empirical review of the empirical literature, 1981–2001. *Psychiatry: Interpersonal and biological processes*. 2002;65(3):207-39.
4. Burkle Jr FM. Acute-phase mental health consequences of disasters: implications for triage and emergency medical services. *Annals of emergency medicine*. 1996;28(2):119-28.
5. Gates MA, Holowka DW, Vasterling JJ, Keane TM, Marx BP, Rosen RC. Posttraumatic stress disorder in veterans and military personnel: Epidemiology, screening, and case recognition. *Psychological services*. 2012;9(4):361.

6. Galea S, Nandi A, Vlahov D. The epidemiology of post-traumatic stress disorder after disasters. *Epidemiologic reviews*. 2005;27(1):78-91.
7. L. HG. Heather Graham L. How Common is PTSD? National Center for PTSD. 2015.:1. National Center for PTSD 2015:1.
8. Kazour F, Zahreddine NR, Maragel MG, Almustafa MA, Soufia M, Haddad R, et al. Post-traumatic stress disorder in a sample of Syrian refugees in Lebanon. *Comprehensive psychiatry*. 2017;72:41-7.
9. Prince M, Patel V, Saxena S, Maj M, Maselko J, Phillips MR, et al. No health without mental health. *The lancet*. 2007;370(9590):859-77.
10. Ayuso-Mateos JL. Global Burden of post-traumatic stress disorder in the year 2000: version 1 estimates. *World Health Organ*. 2002.
11. Kaplan BJ. Kaplan and Sadock's Synopsis of Psychiatry. Behavioral Sciences/Clinical Psychiatry. *Tijdschrift voor Psychiatrie*. 2016;58(1):78-9.
12. Bleich A, Gelkopf M, Solomon Z. Exposure to terrorism, stress-related mental health symptoms, and coping behaviors among a nationally representative sample in Israel. *Jama*. 2003;290(5):612-20.
13. Kalia M. Assessing the economic impact of stress [mdash] The modern day hidden epidemic. *Metabolism-Clinical and Experimental*. 2002;51(6):49-53.
14. Norris FH, Murphy AD, Baker CK, Perilla JL, Rodriguez FG, Rodriguez JdJG. Epidemiology of trauma and posttraumatic stress disorder in Mexico. *Journal of abnormal psychology*. 2003;112(4):646.
15. Atwoli L, Stein DJ, Koenen KC, McLaughlin KA. Epidemiology of posttraumatic stress disorder: prevalence, correlates and consequences. *Current opinion in psychiatry*. 2015;28(4):307.
16. Ozer EJ, Best SR, Lipsey TL, Weiss DS. Predictors of posttraumatic stress disorder and symptoms in adults: a meta-analysis. *Psychological bulletin*. 2003;129(1):52.
17. Akinyemi OO, Owoaje ET, Ige OK, Popoola OA. Comparative study of mental health and quality of life in long term refugees and host populations in Oru-Ijebu, Southwest Nigeria. *BMC research notes*. 2012;5(1):394.
18. Priebe S, Matanov A, Janković Gavrilović J, McCrone P, Ljubotina D, Knežević G, et al. Consequences of untreated posttraumatic stress disorder following war in former Yugoslavia: morbidity, subjective quality of life, and care costs. *Croatian medical journal*. 2009;50(5):465-75.
19. Keane TM, Marshall AD, Taft CT. Posttraumatic stress disorder: etiology, epidemiology, and treatment outcome. *Annu Rev Clin Psychol*. 2006;2:161-97.
20. Kennedy IT, Petley DN, Williams R, Murray V. A systematic review of the health impacts of mass Earth movements (landslides). *PLoS currents*. 2015;7.
21. Catapano F, Malafronte R, Lepre F, Cozzolino P, Arnone R, Lorenzo E, et al. Psychological consequences of the 1998 landslide in Sarno, Italy: a community study. *Acta Psychiatrica Scandinavica*. 2001;104(6):438-42.
22. Karunakara UK, Neuner F, Schauer M, Singh K, Hill K, Elbert T, et al. Traumatic events and symptoms of post-traumatic stress disorder amongst Sudanese nationals, refugees and Ugandans in the West Nile. *African health sciences*. 2004;4(2):83-93.
23. Jaranson JM, Butcher J, Halcon L, Johnson DR, Robertson C, Savik K, et al. Somali and Oromo refugees: correlates of torture and trauma history. *American journal of public health*. 2004;94(4):591-8.
24. Foa EB, Cashman L, Jaycox L, Perry K. The validation of a self-report measure of posttraumatic stress disorder: the Posttraumatic Diagnostic Scale. *Psychological assessment*. 1997;9(4):445.
25. Dalgard OS. The Oslo 3-items social support scale. 20002.
26. COHEN. Perceived Stress Scale. . 1983:7-8.
27. Humeniuk R, Ali R, Babor TF, Farrell M, Formigoni ML, Jittiwutikarn J, et al. Validation of the alcohol, smoking and substance involvement screening test (ASSIST). *Addiction*. 2008;103(6):1039-47.
28. Parvaresh N, Bahramnezhad A. Post-traumatic stress disorder in bam-survived students who immigrated to Kerman, four months after the earthquake. 2009.

29. Ataman M. Prevalence of PTSD and related factors in communities living in conflictual area: Diyarbakir case. 2008.
30. North CS, Nixon SJ, Shariat S, Mallonee S, McMillen JC, Spitznagel EL, et al. Psychiatric disorders among survivors of the Oklahoma City bombing. *Jama*. 1999;282(8):755-62.
31. Fitch T, Villanueva G, Quadir M, Alamgir H. Prevalence and risk factors for PTSD in injured workers in Bangladesh: a study of surviving workers from the Rana Plaza building collapse. *The Lancet Global Health*. 2015;3:S33.
32. Alghamdi M, Hunt N, Thomas S. Prevalence rate of PTSD, depression and anxiety symptoms among Saudi firefighters. *Journal of Traumatic Stress Disorders and Treatment*. 2016;6(1):1-6.
33. Tsujiuchi T, Yamaguchi M, Masuda K, Tsuchida M, Inomata T, Kumano H, et al. High prevalence of post-traumatic stress symptoms in relation to social factors in affected population one year after the Fukushima nuclear disaster. *PloS one*. 2016;11(3):e0151807.
34. Mugisha J, Muyinda H, Wandiembe P, Kinyanda E. Prevalence and factors associated with posttraumatic stress disorder seven years after the conflict in three districts in northern Uganda (The Wayo-Nero Study). *BMC psychiatry*. 2015;15(1):170.
35. Lecic-Tosevski D, Pejuskovic B, Miladinovic T, Toskovic O, Priebe S. Posttraumatic stress disorder in a Serbian community: seven years after trauma exposure. *The Journal of nervous and mental disease*. 2013;201(12):1040-4.
36. Farhood L, Dimassi H, Lehtinen T. Exposure to war-related traumatic events, prevalence of PTSD, and general psychiatric morbidity in a civilian population from Southern Lebanon. *Journal of transcultural nursing*. 2006;17(4):333-40.
37. Brunnet AE, Bolaséll LT, Weber JL, Kristensen CH. Prevalence and factors associated with PTSD, anxiety and depression symptoms in Haitian migrants in southern Brazil. *International Journal of Social Psychiatry*. 2018;64(1):17-25.
38. Jenkins R, Othieno C, Omollo R, Onger L, Sifuna P, Mboroki J, et al. Probable post traumatic stress disorder in kenya and its associated risk factors: a cross-sectional household survey. *International journal of environmental research and public health*. 2015;12(10):13494-509.
39. Arnberg FK, Johannesson KB, Michel P-O. Prevalence and duration of PTSD in survivors 6 years after a natural disaster. *Journal of anxiety disorders*. 2013;27(3):347-52.
40. Zhou X, Kang L, Sun X, Song H, Mao W, Huang X, et al. Prevalence and risk factors of post-traumatic stress disorder among adult survivors six months after the Wenchuan earthquake. *Comprehensive psychiatry*. 2013;54(5):493-9.
41. Heim C, Newport DJ, Heit S, Graham YP, Wilcox M, Bonsall R, et al. Pituitary-adrenal and autonomic responses to stress in women after sexual and physical abuse in childhood. *Jama*. 2000;284(5):592-7.
42. Song JY, Jeong K-S, Choi K-s, Kim M-g, Ahn Y-S. Psychological risk factors for posttraumatic stress disorder in workers after toxic chemical spill in Gumi, South Korea. *Workplace health & safety*. 2018;66(8):393-402.
43. Brewin CR, Andrews B, Valentine JD. Meta-analysis of risk factors for posttraumatic stress disorder in trauma-exposed adults. *Journal of consulting and clinical psychology*. 2000;68(5):748.
44. Keane T, Fisher L, Kriensley K. Posttraumatic stress disorder, *Handbook of prescriptive treatments for adults*. Springer; 1994.
45. Kaniasty K, Norris FH. Longitudinal linkages between perceived social support and posttraumatic stress symptoms: Sequential roles of social causation and social selection. *Journal of Traumatic Stress: Official Publication of The International Society for Traumatic Stress Studies*. 2008;21(3):274-81.
46. Guay S, Billette V, Marchand A. Exploring the links between posttraumatic stress disorder and social support: Processes and potential research avenues. *Journal of Traumatic Stress: Official Publication of The International Society for Traumatic Stress Studies*. 2006;19(3):327-38.

1  
2 47. Besser A, Neria Y, Haynes M. Adult attachment, perceived stress, and PTSD among civilians  
3 exposed to ongoing terrorist attacks in Southern Israel. *Personality and Individual Differences*.  
4 2009;47(8):851-7.

5 48. Taylor S. *Clinician's guide to PTSD: A cognitive-behavioral approach*: Guilford Publications; 2017.  
6  
7  
8  
9

10 List of figure

11  
12 Fig 1: Showing prevalence of PTSD among residents of Koshe, Addis Ababa, Ethiopia, 2018  
13 (n=830)  
14  
15  
16  
17  
18  
19  
20  
21  
22  
23  
24  
25  
26  
27  
28  
29  
30  
31  
32  
33  
34  
35  
36  
37  
38  
39  
40  
41  
42  
43  
44  
45  
46  
47  
48  
49  
50  
51  
52  
53  
54  
55  
56  
57  
58  
59  
60

For peer review only

1  
2  
3  
4  
5  
6  
7  
8  
9  
10  
11  
12  
13  
14  
15  
16  
17  
18  
19  
20  
21  
22  
23  
24  
25  
26  
27  
28  
29  
30  
31  
32  
33  
34  
35  
36  
37  
38  
39  
40  
41  
42  
43  
44  
45  
46  
47  
48  
49  
50  
51  
52  
53  
54  
55  
56  
57  
58  
59  
60

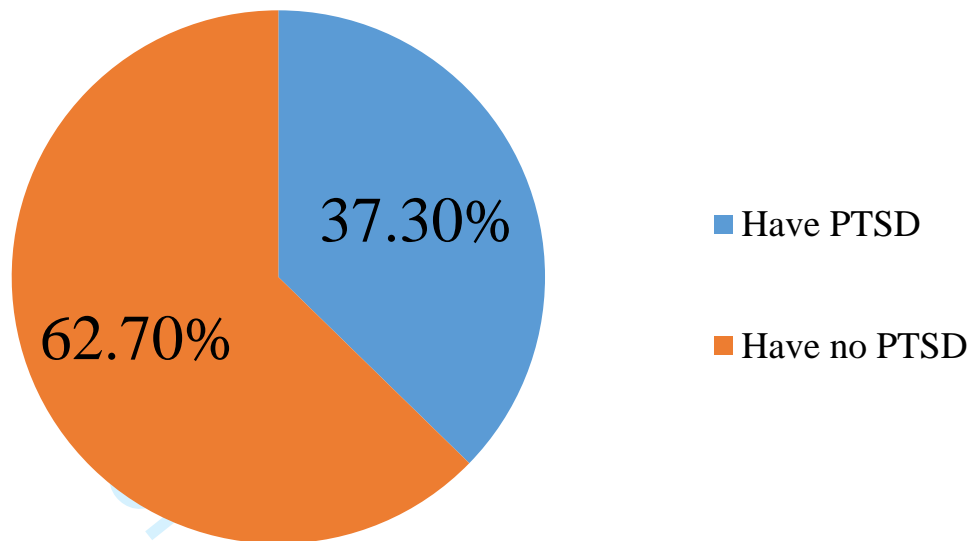

1  
2  
3  
4  
5  
6  
7  
8  
9  
10  
11  
12  
13  
14  
15  
16  
17  
18  
19  
20  
21  
22  
23  
24  
25  
26  
27  
28  
29  
30  
31  
32  
33  
34  
35  
36  
37  
38  
39  
40  
41  
42  
43  
44  
45  
46  
47  
48  
49  
50  
51  
52  
53  
54  
55  
56  
57  
58  
59  
60STROBE Statement—Checklist of items that should be included in reports of *cross-sectional studies*

|                              | Item No | Recommendation                                                                                                                                                                                                                                                                                                                                                                                                                                             |
|------------------------------|---------|------------------------------------------------------------------------------------------------------------------------------------------------------------------------------------------------------------------------------------------------------------------------------------------------------------------------------------------------------------------------------------------------------------------------------------------------------------|
| <b>Title and abstract</b>    | 1       | (a) Indicated in page-I, red color highlighted<br>(b) Indicated in page II and changes are highlighted                                                                                                                                                                                                                                                                                                                                                     |
| <b>Introduction</b>          |         |                                                                                                                                                                                                                                                                                                                                                                                                                                                            |
| Background/rationale         | 2       | Explained page -1 of the introduction section                                                                                                                                                                                                                                                                                                                                                                                                              |
| Objectives                   | 3       | Stated in page-2                                                                                                                                                                                                                                                                                                                                                                                                                                           |
| <b>Methods</b>               |         |                                                                                                                                                                                                                                                                                                                                                                                                                                                            |
| Study design                 | 4       | page 2                                                                                                                                                                                                                                                                                                                                                                                                                                                     |
| Setting                      | 5       | page-2                                                                                                                                                                                                                                                                                                                                                                                                                                                     |
| Participants                 | 6       | (a) page-3                                                                                                                                                                                                                                                                                                                                                                                                                                                 |
| Variables                    | 7       | Clearly define all outcomes, exposures, predictors, potential confounders, and effect modifiers. (Page-3)                                                                                                                                                                                                                                                                                                                                                  |
| Data sources/<br>measurement | 8*      | For each variable of interest, give sources of data and details of methods of assessment (measurement). ( Page-4)                                                                                                                                                                                                                                                                                                                                          |
| Bias                         | 9       | Describe any efforts to address potential sources of bias                                                                                                                                                                                                                                                                                                                                                                                                  |
| Study size                   | 10      | Explain how the study size was arrived at (page-3)                                                                                                                                                                                                                                                                                                                                                                                                         |
| Quantitative variables       | 11      | Explain how quantitative variables were handled in the analysis. (No qualitative data)                                                                                                                                                                                                                                                                                                                                                                     |
| Statistical methods          | 12      | (a) Describe all statistical methods, including those used to control for confounding (page-5)<br>(b) Describe any methods used to examine subgroups and interactions (no sub group )<br>(c) Explain how missing data were addressed (page-5 in data processing section)<br>(d) If applicable, describe analytical methods taking account of sampling strategy (page-3)<br>(e) Describe any sensitivity analyses (page-4)                                  |
| <b>Results</b>               |         |                                                                                                                                                                                                                                                                                                                                                                                                                                                            |
| Participants                 | 13*     | (a) Report numbers of individuals at each stage of study—eg numbers potentially eligible, examined for eligibility, confirmed eligible, included in the study, completing follow-up, and analysed (page-6)<br>(b) Give reasons for non-participation at each stage ( some is not voluntary, some is not present during data collection )                                                                                                                   |
| Descriptive data             | 14*     | (c) Consider use of a flow diagram (we were not using since it is not relevant here)<br>(a) Give characteristics of study participants (eg demographic, clinical, social) and information on exposures and potential confounders (page 6-7)<br>(b) Indicate number of participants with missing data for each variable of interest (page-6)                                                                                                                |
| Outcome data                 | 15*     | Report numbers of outcome events or summary measure (page-7)                                                                                                                                                                                                                                                                                                                                                                                               |
| Main results                 | 16      | (a) Give unadjusted estimates and, if applicable, confounder-adjusted estimates and their precision (eg, 95% confidence interval). Make clear which confounders were adjusted for and why they were included ( page 7-8)<br>(b) Report category boundaries when continuous variables (no continuous variable used)<br>(c) If relevant, consider translating estimates of relative risk into absolute risk for a meaningful time period (no relevancy here) |
| Other analyses               | 17      | Report other analyses done—eg analyses of subgroups and interactions, and sensitivity analyses (no)                                                                                                                                                                                                                                                                                                                                                        |

|                          |    |                                                                                                                                                                          |
|--------------------------|----|--------------------------------------------------------------------------------------------------------------------------------------------------------------------------|
| <b>Discussion</b>        |    |                                                                                                                                                                          |
| Key results              | 18 | Summarise key results with reference to study objectives (page 9-11)                                                                                                     |
| Limitations              | 19 | Discuss limitations of the study, taking into account sources of potential bias or Imprecision. Discuss both direction and magnitude of any p(page11-12)                 |
| (Interpretation          | 20 | Give a cautious overall interpretation of results considering objectives, limitations, multiplicity of analyses, results from similar studies, and other relevant (page- |
| 12) Generalisability     | 21 | Discuss the generalisability (external validity) of the study results(page -12)                                                                                          |
| <b>Other information</b> |    |                                                                                                                                                                          |
| Funding                  | 22 | Give the source of funding and the role of the funders for the present study and, if applicable, for the original study on which the present article is based(page 12)   |

\*Give information separately for exposed and unexposed groups.

**Note:** An Explanation and Elaboration article discusses each checklist item and gives methodological background and published examples of transparent reporting. The STROBE checklist is best used in conjunction with this article (freely available on the Web sites of PLoS Medicine at <http://www.plosmedicine.org/>, Annals of Internal Medicine at <http://www.annals.org/>, and Epidemiology at <http://www.epidem.com/>). Information on the STROBE Initiative is available at [www.strobe-statement.org](http://www.strobe-statement.org).



# BMJ Open

## The prevalence of post-traumatic stress disorder and associated factors among Koshe landslide survivors, Addis Ababa Ethiopia: A community-based, cross-sectional study

|                                 |                                                                                                                                                                                                                                                                                     |
|---------------------------------|-------------------------------------------------------------------------------------------------------------------------------------------------------------------------------------------------------------------------------------------------------------------------------------|
| Journal:                        | <i>BMJ Open</i>                                                                                                                                                                                                                                                                     |
| Manuscript ID                   | bmjopen-2018-028550.R2                                                                                                                                                                                                                                                              |
| Article Type:                   | Research                                                                                                                                                                                                                                                                            |
| Date Submitted by the Author:   | 31-May-2019                                                                                                                                                                                                                                                                         |
| Complete List of Authors:       | Asnakew, Sintayehu ; Debretabor University, Psychiatry shumet, shegaye; University of Gondar, psychiatry Ginbare , Worknesh ; Amanuel mental specialized hospital, Psychiatry Legas, Getasew ; Debretabor university, Psychiatry Haile , Kalkidan ; Dbremarkos hospital, psychiatry |
| <b>Primary Subject Heading</b>: | Mental health                                                                                                                                                                                                                                                                       |
| Secondary Subject Heading:      | Public health                                                                                                                                                                                                                                                                       |
| Keywords:                       | Ethiopia, Addis Ababa, Koshe landslides, post-traumatic stress disorder                                                                                                                                                                                                             |
|                                 |                                                                                                                                                                                                                                                                                     |

SCHOLARONE™  
Manuscripts

1  
2 **The prevalence of post-traumatic stress disorder and associated factors**  
3 **among Koshe landslide survivors, Addis Ababa Ethiopia: A community-**  
4 **based, cross-sectional study**  
5  
6  
7

8  
9 Sintayehu Asnakew<sup>1\*</sup> Shegaye Shumet<sup>2</sup>, Worknesh Ginbare <sup>3</sup>, Getasew Legas <sup>1</sup>Kalkidan  
10 Haile <sup>4</sup>  
11

12  
13 <sup>1</sup> Department of Psychiatry, College Health Sciences, Debretabor University, Debretabor,  
14 Ethiopia  
15

16  
17 <sup>2</sup>Department of psychiatry, School of medicine, College of Medicine and Health Sciences,  
18 University of Gondar, Gondar, Ethiopia  
19

20  
21 <sup>3</sup> Department of psychiatry, Amanuel mental specialized hospital, Addis Ababa, Ethiopia  
22

23  
24 <sup>4</sup>Department of psychiatry, Debre markos hospital, Debre markos, Ethiopia  
25

26 SA1: [sintie579@gmail.com](mailto:sintie579@gmail.com)  
27

28 SS: [shumetshegaye@yahoo.com](mailto:shumetshegaye@yahoo.com)  
29

30 WG: [workneshginbare@gmail.com](mailto:workneshginbare@gmail.com)  
31

32 GL: [getasewlegas@gmail.com](mailto:getasewlegas@gmail.com)  
33

34 KH: [kalkidan946@gmail.com](mailto:kalkidan946@gmail.com)  
35

36  
37  
38 \*Corresponding Author. Shegaye shumet  
39

40 Department of psychiatry, university of Gondar, Gondar, Ethiopia  
41

42 . Tel.:+251918045505/+251967148362 Email: [shumetshegaye@yahoo.com](mailto:shumetshegaye@yahoo.com)  
43  
44  
45  
46  
47  
48  
49  
50  
51  
52  
53  
54  
55  
56  
57  
58  
59  
60

## Abstract

**Objectives:** To assess the prevalence of post-traumatic stress disorder and associated factors among the survivors of Koshe landslide, Addis Ababa, Ethiopia, 2018

**Design:** Community-based cross-sectional design.

**Setting:** Koshe landslide, Addis Ababa, Ethiopia

**Participants:** We recruited 830 participants for interviews using the simple random sampling technique.

**Measurement:** We collected data by face-to-face interviews. The civilian version of the post-traumatic stress disorder checklist was used to measure the symptoms of the disorder. The perceived Stress Scale (PSS) and the Oslo-3 social support instruments were used to assess the factors. Coded variables were entered into Epi data version 4.2 and exported to SPSS version 24 for analysis. Bivariate and multivariate logistic regressions with odds ratio and 95% confidence interval were employed.

**Result:** A total of 830 participants were interviewed, with a response rate of 98.2%. The prevalence of post-traumatic stress disorder was 37.3 % with ( 95 % CI: 34.1, 40.8). In the multivariate logistic regression, female sex (AOR=1.74, 95%CI; 1.21,2.50), divorce (AOR=2.08,95%CI; 1.26,3.43), sustained physical injury(AOR=8.28,95%CI; 5.04,13.61) , history of mental illness ( AOR = 5.55 , 95% CI ; 2.30 , 13.36 ) , family history of mental illness ( AOR = 2.82 , 95 %CI ; 1.48 , 5.37 ) , poor social support ( AOR = 3.64 , 95 %CI ; 1.99 , 6.69 ) , and high perceived stress ( AOR = 3.08 , 95 CI , 1.43 , 6.64 ) were associated with post-traumatic stress disorder.

**Conclusion and recommendations:** The prevalence of post-traumatic stress disorder among the survivors of Koshe landslide was high. We recommend that an early PTSD-focused regular screening be carried out by trained health professionals; linkage with mental health service providers also needs to be considered.

### Strengths and limitations of the study

- The nature of cross-sectional design, which might have only partially accounted for durable temporal relationships.
- Social and recall biases might have interfered with decisions respondents made when completing the questionnaire.
- The PTSD Checklist–Civilian Version scale used in the current study can serve as a reference in subsequent studies since it has good internal consistency.

**Keywords:** Koshe landslides, post-traumatic stress disorder

## Introduction

Posttraumatic stress disorder is a mental health problem that occurs following a traumatic event in which the individual experience, witnesses, is confronted with either actual or imagined loss of life or serious injury which results in a response of fear, helplessness, or horror(1). In order to be diagnosed with post-traumatic stress disorder (PTSD), a person must re-experience the trauma, avoidance of trauma-related stimuli, excessive arousal, and negative alterations in cognition and mood which occur within a month after the event(2). A disaster is a traumatic event that might have been experienced by many people and causes different mental and physical health consequences(3). A survey study conducted on USA residents, 13% of the participants reported a lifetime exposure to natural or human-generated disasters(4). Several studies conducted among adults showed that there was an increasing psychological distress after natural disasters(5). Although the consequences of a disaster included a wide range of psychopathology, a review study indicated that PTSD is the most commonly investigated and frequently occurring psychopathology following disaster(6).

About eight million adults had PTSD during a given year worldwide(7). Over fifty-one million people are being forcibly displaced worldwide, of whom 16.7 million were displaced outside their home countries, and this may lead to a stress-related disorders(8). The global disease burden report attributed about 14% of the burden to neuropsychiatric disorders, mostly because of the long term disabling nature of depression and other common mental disorders like PTSD(9). According to World Health Report 2001, approximately 0.4% of the total YLD followed post-traumatic stress disorder, and the estimated burden increased to 0.6% YLD globally (10). Data in USA showed the lifetime prevalence of PTSD was 8 % in the general population. The lifetime prevalence rate was 10 % in women and 4 % in men(11) . A study on Israelis aged 18 years and above and exposed to terrorism showed that the average prevalence of PTSD was 9.4%, 16.2% for women and 2.4% for men (12). The global economic burden of stress-related mental illness is expected to rise in the coming decade. The global disease burden study of WHO estimates that mental illness, including stress-related disorders, will be the second leading cause of disability by the year 2020(13).

The prevalence rate of PTSD in developing countries is higher compared with the developed ones. A study conducted among a geographically diverse sample of Mexican adults estimated the prevalence of PTSD at 19%(14). Different studies in Africa showed that PTSD could still be a

1  
2 public health concern for several years after the civil conflict and natural disaster. Reviews of  
3 community-based studies in South Africa showed that trauma exposure was higher in low-income  
4 countries than in their counterparts (15). Another study in Uganda during an active conflict showed  
5 that PTSD prevalence varied between 18% and 54 % in the general population (16).  
6  
7

8  
9 PTSD is a public health issue that contributes to poverty, lack of employment, insecure living  
10 circumstances, change in the social network and is highly associated with low quality of life (17,  
11 18). Factors that contribute to the development of post-traumatic stress disorder have been  
12 classified into pre-existing factors like family history of mental illness, substance history as well  
13 as the traumatic event itself, and post-trauma factors, such as lack of social support (19).  
14  
15

16  
17 There was a devastating garbage landslide in Addis Ababa, Ethiopia, in the area of Koshe garbage  
18 land fill on 11<sup>th</sup> March, 2017. The catastrophic slope collapse killed more than 113 people who  
19 were living around the landfill and injured several others. The debris stood from a height of 20 m  
20 beyond the actual toe line of the landfill, destroying a minimum of fifty houses (20, 21). The  
21 phenomenon occurred in the early morning hours of March 11 and buried a number of makeshift  
22 homes under tons of refuse as reported by Eddie Haywood (March 2017). Koshe landfill is a large  
23 man-made mount formed from vast rubbish dump on the outskirts of Addis Ababa, the capital of  
24 Ethiopia. Hundreds of people used to attempt to make a living by collecting refuse at the landfill  
25 site and selling it. Some people even lived around the rubbish dump permanently. Even though  
26 landslides sometimes happened in Ethiopia, a man-made garbage hill slide like this was quite. The  
27 landslide left a negative sequel on the victims' socioeconomic and psychological conditions, for  
28 example, in terms of housing, job and loss of family members.  
29  
30

31  
32 Disasters including man-made mishaps have negative impacts on the mental health of affected  
33 individuals(22). Post-traumatic stress disorder is the most common psychopathology and notable  
34 public health matter that follows trauma/disaster. Although PTSD is highly prevalent among post-  
35 disaster settings, no studies have been done on the prevalence of PTSD among Koshe landslide  
36 survivors, Addis Ababa, Ethiopia. So, determining the prevalence of PTSD and associated factors  
37 among the survivors is important for early intervention and the reduction of the burden of PTSD  
38 and to improve the victims' quality of life.  
39  
40  
41  
42  
43  
44  
45  
46  
47  
48  
49  
50  
51  
52  
53  
54  
55  
56  
57  
58  
59  
60

## Objective

This study set out to assess the prevalence of post-traumatic stress disorder and associated factors among the survivors of Koshe landslide, Addis Ababa, Ethiopia, 2018.

## Methods and materials

### Study settings and period

A community-based, cross-sectional study was conducted in May and June 2018. The study was conducted at Koshe(dirt), a large open landfill with a surface area of 25 hectares which used to receive 300,000 tons of solid waste from Addis Ababa, the capital of Ethiopia, annually as reported by Clague 2017. It was the only dumping site available for the entire capital city with more than three million inhabitants. It has been located in the southwestern part of Addis Ababa bounded by Nefas Silk-Lafto and Kolfie sub-cities. The area was a dumping ground for Addis Ababa's rubbish for more than five decades, hosting hundreds of rubbish pickers who sell materials recovered from the waste. Some people even live around the site permanently.

### Study participants and sampling

We used the multistage sampling technique to select 830 participants. To reach households, the simple random sampling technique (computer-generated random number) was employed. In each of the areas, household lists were obtained from the kebeles/wards/ offices and health extension workers. We proportionally allocated the sample size to Kilinto, Asko, Addis Hiwot and Koshe garbage dumping area, where victims temporarily settled. Members of the selected households were further sorted for interviews. In case of more than one eligible participant in a household, the lottery method was used to choose one.

The study included participants aged 15 years and above during data collection in the area. There were a total of 5316 people in nearly 1035 households. Individuals seriously ill and unable to communicate were excluded.

### Sample size determination

We determined the sample size by using the single population proportion formula with the assumptions of 48% prevalence of post-traumatic stress disorder from studies conducted in South Sudan(23), 0.48 P, 1.96 Z (standard normal distribution), 95% CI,  $\alpha=0.05$ , and a 10% non-response

1  
2 rate . Accordingly, a representative/probabilistic sample was calculated to be 423. After  
3  
4 considering design effect, the total sample was 846.

### 5 6 **Study variables**

7 The dependent variable was posttraumatic stress disorder measured by the 17 items of the PTSD  
8 checklist-Civilian version. We measured PTSD as a dichotomous variable (yes/no). Independent  
9 variables included sociodemographic factors (age, sex, marital status, ethnicity, religion,  
10 educational and occupational status), clinical variables (family history of mental illness, previous  
11 history of mental illness and childhood trauma), trauma related factors (trauma exposure,  
12 perceived life threat ), substance related factors(alcohol consumption, cigarette smoking, khat  
13 chewing), awhile psychosocial factors embraced social support and stressful life events.

### 14 15 16 17 18 19 **Data sources and measurement**

20  
21 Data were collected by face-to-face interviews using a semi-structured questionnaire by four  
22 trained data psychiatry nurses by means of the Amharic version of the tool for a month. The  
23 questionnaire was designed in English and translated to Amharic and back to English to maintain  
24 consistency. Data collectors were trained on how to interview participants and explain unclear  
25 questions and the purpose of the study. Furthermore, they were made aware about ethical  
26 principles, such as confidentiality/ anonymity/ data management, and securing respondents'  
27 informed consent for participation.

28  
29 Post-traumatic stress disorder was measured using the post-traumatic stress disorder Checklist-  
30 Civilian version (PCL-C). The PCL is a standardized self-report rating scale for PTSD comprising  
31 17 items that correspond to the key Diagnostic and Statistical Manual of Mental Disorders (DSM)-  
32 IV symptoms of PTSD. A total symptom severity score (range=17–85) was obtained by summing  
33 the scores from each of the 17 items. It had a likert response options ranging from (1) “Not at all”  
34 to (5) “Extremely” and a cut-off  $\geq 50$ , that is, garbage landslide victims had PTSD symptoms  
35 (24). We adapted this instrument from a study conducted on Somali and Oromo Ethiopians in  
36 Minnesota (25). It showed a high internal consistency, reliability and a strong correlation with  
37 PTSD diagnosis. We conducted a reliability analysis for the PCL-C questionnaire (Amharic  
38 version) and that it had high score (Cronbach's  $\alpha = 0.94$ ).

39  
40  
41  
42  
43  
44  
45  
46  
47  
48  
49  
50  
51 **Social support** was measured using the Oslo 3-items social support scale with scores ranging from  
52 3 to 14: 3–8=poor social support; 9–11=intermediate social support; and 12–14=strong social  
53 support (26).  
54  
55



1  
2 **Individual stress levels** were measured using the Perceived Stress Scale (PSS). The questions in  
3 this scale asked about feelings and thoughts last month. PSS was measured with likert type scale  
4 ranging from ( 0) “Never” to (4) “Very often ” and individuals with higher scores indicating higher  
5 perceived stress(27).  
6  
7

8  
9 **Substance use history:** To examine substance use history, respondents were asked: “Have you ever  
10 used any substance in the last three months or in your lifetime?” and the responses were Yes/No  
11 (28).  
12

13  
14 **History of mental illness:** To examine history of mental illness, respondents were asked: “Have you  
15 ever been diagnosed with mental illness and treated” and responses were Yes/No.  
16

17  
18 **Family history of mental illness:** To examine family history of mental illness, respondents were  
19 asked: “Do you know a family member who had experienced a mental illness?”  
20

21  
22 **Experiencing childhood trauma:** To examine childhood trauma, respondents were asked: “Have  
23 you experienced childhood physical and sexual abuse and neglect” and responses were Yes/No.  
24

25 **Items on socio-demographic factors** (age, sex, ethnicity, religion, marital status, educational status  
26 and occupational status) were adopted from a variety literature.  
27  
28

### 29 **Data processing and analysis**

30  
31 All collected data were checked for completeness and consistency and entered into Epi-data  
32 version 4.2 and then exported to SPSS for windows version 24 for analysis.  
33

34  
35 We computed descriptive, bivariate and multivariate logistic regression analyses to see the  
36 frequency distribution and to test the association between independent and dependent variables,  
37 respectively. Factors associated with PTSD were selected during the bivariate analysis with a p-  
38 value <0.05 for further analysis in the multivariable logistic regression analysis. In the  
39 multivariable logistic regression analysis, variables with P-value less than 0.05 at 95% confidence  
40 interval with adjusted odds ratio were considered as statistically significant.  
41  
42  
43

### 44 **Ethical consideration**

45  
46  
47 Approval was obtained from the Ethical Review Board and ethical clearance from the joint Ethical  
48 Review Committees of the University of Gondar and Amanuel mental specialized hospital.  
49 Permission was obtained from the Addis Ababa Administration Health Bureau Ethical Committee.  
50  
51 We received written informed consent from study participants and assent from officially  
52  
53  
54  
55



authorized foster parents after explaining the purpose of the study. Confidentiality was maintained by omitting personal identifiers.

### Patient and public involvement

In the current study, participants were people who survived the Koshe landfill, Addis, Ababa, Ethiopia; patients were excluded; participants were not involved in the study design and recruitment. The results of this study will be disseminated to the Federal Ministry of Health, Addis Ababa Health Bureau, and Kolfe sub-city Health Department for timely management of survivors.

### Result

A total of 830 respondents took part with a response rate of 98.2%. The majority of the respondents, 491 (59.2%), were female. The mean age of the respondents was 33(SD ±12) years; 675 (81.3%) were in the age range of 15-40 years; 428(51.6%) were married; 502 (60.5%) were Orthodox Christian, and 404 (48.7%) Amhara by ethnicity. Regarding occupation, more than half (56.6%) were employed (**table1**).

Table 1: Sociodemographic characteristics of study participants among residents of Koshe area, Addis Ababa, Ethiopia, 2018 (n=830).

| Characteristics | Frequency | Percentage |
|-----------------|-----------|------------|
| Age             |           |            |
| 15-40           | 675       | 81.3       |
| >40             | 155       | 18.7       |
| Sex             |           |            |
| Female          | 491       | 59.2       |
| Male            | 339       | 40.8       |
| Marital status  |           |            |
| Married         | 428       | 51.6       |
| Single          | 249       | 30.0       |
| Divorced        | 131       | 15.8       |
| Others *        | 22        | 2.7        |
| Ethnicity       |           |            |
| Amhara          | 404       | 48.7       |
| Tigray          | 138       | 16.6       |
| Gurage          | 135       | 16.3       |
| Oromo           | 123       | 14.8       |
| Others **       | 30        | 3.6        |

|                       |     |      |
|-----------------------|-----|------|
| Religion              |     |      |
| Orthodox              | 502 | 60.5 |
| Muslim                | 195 | 23.5 |
| Protestant            | 94  | 11.3 |
| Catholic              | 39  | 4.7  |
| Educational status    |     |      |
| Cannot read and write | 153 | 18.4 |
| Primary school        | 366 | 44.1 |
| Secondary school      | 185 | 22.3 |
| Diploma and above     | 126 | 15.2 |
| Occupational status   |     |      |
| House wife            | 131 | 15.8 |
| Employed              | 472 | 56.9 |
| Student               | 110 | 13.3 |
| Jobless               | 117 | 14.0 |

NB: others \* separated, widowed, others\*\* Silte, Hadya

A small number, 55(6.6%) of the participants had history of mental illness, 202 (24.3%) childhood physical abuse and neglect experience, and 79 (9.5%) family history of mental illness.

Of the respondents, 569 (68.6%) witnessed physical injury of families or friends, and about 166 (20%) sustained physical injury and 581 (70 %) moderate perceived life threat (**table 2**).

**Table 2:** Distribution of trauma-related factors of the respondents in Koshe, Addis Ababa, Ethiopia, 2018 (n=830)

| Characteristics                                   | Frequency | Percentage |
|---------------------------------------------------|-----------|------------|
| Sustaining physical injury                        | 166       | 20.0       |
| Witnessing the death of families or friends       | 526       | 63.4       |
| Witnessing physical injury of families or friends | 569       | 68.6       |
| Property destruction                              | 240       | 28.9       |
| Thinking, they may die                            | 546       | 65.8       |
| Perceived life threat                             |           |            |
| Low perceived stress                              | 185       | 22.3       |
| Moderate perceived stress                         | 581       | 70.0       |
| High perceived stress                             | 64        | 7.7        |

Out of the total 830 participants, nearly half (48%) had poor social support and the majority, 659(79.4%), experienced at least one stressful life event (**table 3**).

**Table 3:** Distribution of psychosocial factors of the study participants among residents of Koshe Addis Ababa, Ethiopia, 2018(n= 83)

| Characteristics              | Category | Frequency | percent |
|------------------------------|----------|-----------|---------|
| <b>Social support</b>        | Poor     | 398       | 48.0    |
|                              | Moderate | 324       | 39.0    |
|                              | Strong   | 108       | 13.0    |
| <b>Stressful life events</b> | Yes      | 659       | 79.4    |
|                              | No       | 171       | 20.6    |

Regarding substance-related factors, nearly three fourths, 602(72.5%) consumed alcohol, and 516(62.20%) were drinking that at the moment; 164 (19.80%) smoked, and 102(12.30%) were smoking; 129(15.5%) used khat (leaves) and 102(12.30%) were using it during the study.

### Prevalence of PTSD

The prevalence of post-traumatic stress disorder (PTSD) among participants was 37.3% (95 % CI: 34.1, 40.8).

### Factors associated with posttraumatic stress disorder

To determine the association of independent variables with PTSD, bivariate and multivariate binary logistic regression analyses were carried out. In the bivariate analysis, factors including female sex, >60 years of age, divorce, history of mental illness, family history of mental illness, childhood physical trauma and neglect, physical injury, witnessing the death and physical injury of families or friends, property destruction, fear of death, poor social support, and high perceived life threat were significantly associated with post-traumatic stress disorder at a P-value less than 0.05. These factors were entered into the multivariable logistic regression model to control confounding effects.

The result of the multivariate analysis showed that female sex, divorce, history of mental illness, family history of mental illness, physical injury, poor social support, and high perceived life threat were significantly associated with PTSD at a p-value less than 0.05.

Female sex was 1.7 times more likely to develop PTSD compared with male sex (AOR=1.7,95 %CI; 1.2,2.5).The odds of developing PTSD were 2.1 times higher among divorcees compared with the married ones (AOR=2.1,95%CI;1.3,3.4). The odds of developing PTSD were 5.6 times higher among participants who had history of mental illness compared with those who had no such history (AOR=5.6,95% CI,2.3,13.4). The likelihood of developing PTSD was 2.8 times higher among respondents who had family history of mental illness compared with those who had no family history of mental illness (AOR=2.8, 95% CI, 1.5, 5.4).The odds of developing PTSD were 8.3 times higher among respondents who sustained physical injury than those who hadn't (AOR=8.3, 95% CI, 5.0, 13.6). Respondents who had poor social support were 3.6 times more likely to develop PTSD compared with those who had strong social support( AOR= 3.6,95% CI,2.0,6.7).The odds of developing PTSD were 3.1 times higher among respondents who had high perceived stress than those who had low perceived stress (AOR= 3.1, 95% CI;1.4,6.6) (**Table 4**).

**Table 4:** Factors associated with PTSD among residents of Koshe, Addis Ababa, Ethiopia, 2018 (n= 830)

| Variables                     | Category | PTSD       |             | COR(95%CI)      | AOR(95%CI)      |
|-------------------------------|----------|------------|-------------|-----------------|-----------------|
|                               |          | Yes        | No          |                 |                 |
| Sex                           | Male     | 106(31.3%) | 233(68.7%)  | 1               | 1               |
|                               | Female   | 204(41.5%) | 287(58.5 %) | 1.6(1.2,2.1)**  | 1.7(1.2,2.5)**  |
| Age                           | 15-40    | 241(35.7%) | 434(64.3%)  | 1               | 1               |
|                               | >40      | 69(44.5%)  | 86(55.5%)   | 1.5(1.0,2.1)    | 1.4(0.9,2.1)    |
| Marital status                | Married  | 138(32.2%) | 290(67.7%)  | 1               | 1               |
|                               | Single   | 87(34.9%)  | 162(65.1%)  | 1.1(0.8,1.6)    | 1.2(0.8,1.8)    |
|                               | Divorced | 77(58.8%)  | 54(41.2%)   | 3.0(2.0,4.5)**  | 2.1(1.3,3.4)**  |
|                               | Others   | 8(36.4%)   | 14(63.6%)   | 1.2(0.5,2.9)    | 1.4(0.5,4.2)    |
| History(Hx) of mental illness | Yes      | 46(83.6%)  | 9(16.4%)    | 9.9(4.8,20.5)** | 5.6(2.3,13.4)** |
|                               | No       | 264(34.1%) | 511(65.9%)  | 1               | 1               |
| Family Hx of mental illness   | Yes      | 55(69.6%)  | 24(30.4%)   | 4.5(2.7,7.4)**  | 2.8(1.5,5.4)**  |

|                                          |          |            |            |                  |                 |
|------------------------------------------|----------|------------|------------|------------------|-----------------|
|                                          | No       | 255(34.0%) | 496(66.0%) | 1                | 1               |
| Experiencing childhood trauma            | Yes      | 109(54.0%) | 93(46.6%)  | 2.5(1.8,3.4)     | 1.2(0.7,1.9)    |
|                                          | No       | 201(32.0%) | 427(68.0%) | 1                | 1               |
| Sustaining Physical trauma               | Yes      | 135(81.3%) | 31(18.7%)  | 12.2(7.9,18.7)** | 8.3(5.0,13.6)** |
|                                          | No       | 175(26.4%) | 489(73.6%) | 1                | 1               |
| Witnessing the death of family or friend | yes      | 223(42.4%) | 303(57.6%) | 1.9(1.4,2.5)     | 0.8(0.5,1.4)    |
|                                          | No       | 87(28.6%)  | 217(71.4%) | 1                | 1               |
| Witnessing injury of family or friend    | Yes      | 238(41.8%) | 331(58.2%) | 1.9(1.4,2.6)     | 0.8(0.5,1.4)    |
|                                          | No       | 2(1.1%)    | 189(98.9%) | 1                | 1               |
| Property destruction                     | Yes      | 117(48.8%) | 123(51.2%) | 2.0(1.4,2.7)     | 1.0(0.7,1.5)    |
|                                          | No       | 193(32.7%) | 397(67.3%) | 1                | 1               |
| Thought of death                         | Yes      | 242(44.3%) | 304(55.7%) | 2.5(1.8,3.5)     | 1.3(0.7,2.0)    |
|                                          | No       | 68(23.9%)  | 216(76.1%) | 1                | 1               |
| Social support                           | poor     | 209(52.5%) | 189(47.5%) | 4.9(2.9,8.2)**   | 3.6(2.0,6.7)**  |
|                                          | Moderate | 81(25.0%)  | 243(75.0%) | 1.5(0.9,2.5)     | 1.4(0.8,2.6)    |
|                                          | Strong   | 20(18.5%)  | 88(81.5%)  | 1                | 1               |
| Perceived threat                         | Low      | 56(30.3%)  | 129(69.7%) | 1                | 1               |
|                                          | Moderate | 209(36.0%) | 372(64.0%) | 2.9(1.9,4.6)     | 1.0(0.7,1.6)    |
|                                          | High     | 45(70.3%)  | 19(29.7%)  | 10.9(5.6,21.4)** | 3.1(1.4,6.6)**  |

Key: \*\*=p-value<0.05,Model fitness=0.114 (hosmer and lemshow),=0.000(Omnibus test), no multicollinearity (tolerance>0.1 and VIF<2)

## Discussion

Post-traumatic stress disorder is the most common psychopathology and important public health matter after experiencing trauma/disaster. We found that, for the entire sample, the garbage landslide had a negative impact on exposed individuals' mental health in terms of housing, income, jobs and family problems resulting from the event. This study found that a number of people met the criteria for post trauma stress symptomatology. Some 37.3% of people who experienced the incident presented with posttraumatic stress disorder symptoms according to the post-traumatic stress disorder checklist-civilian version. Our finding was consistent with reports of studies on

1  
2 people exposed to natural disasters, such as 36.3% among earth quack victims in Kerman, 35.4%  
3  
4 Syrian refugees in Lebanon, 34.9% in Turkey, and 34.3% among the bombing victims of  
5  
6 Oklahoma city, USA (8, 29-31). Conversely, this finding was lower than the 48% noted in South  
7  
8 Sudan, 75.6% among the Rana Plaza building collapse victims in Bangladesh, 57% in Saudi  
9  
10 Arabia, 83.7% in Croatia and Serbia former Yugoslavia, Germany and U.K, 59.4% in Fukushima  
11  
12 nuclear disaster, Japan (18, 23, 32-34). The possible reason for this difference might be the use of  
13  
14 different instruments and cutoff points to measure PTSD, exposure to multiple trauma, study  
15  
16 design and the nature and magnitude of the accidents covered in the study.

16  
17 On the other hand, our estimations are higher than findings in other countries, for example, 11.8%  
18  
19 in northern Uganda, 18.8% in Serbia, 29.3% in Southern Lebanon, and 9.1% in sothern Brazil (35-  
20  
21 38). The possible reason for this variation might be difference in instruments. That is, the other  
22  
23 study used GHQ-12, structured clinical interview, MINI, the modified version of the composite  
24  
25 international diagnostic interview, while we utilized the post-traumatic stress disorder checklist  
26  
27 civilian version. The other variation might be due to the methods they used for data collection  
28  
29 (structured telephone interview) and conducting of studies late after the trauma.

28  
29 Female sexes, being divorce, history of mental illness, family history of mental illness, sustained  
30  
31 physical injury, poor social support and high perceived life threat were significantly associated  
32  
33 with PTSD. The greater likelihood of PTSD among women than men in our work was similar to  
34  
35 the reports of other studies (29, 31, 32, 39-41), possibly because females experience sexual assaults  
36  
37 and child sexual abuse more than males. Hence, being exposed to such trauma involves more risk  
38  
39 than other trauma in causing PTSD(42).

39  
40 Divorcees were more likely to develop PTSD than married respondents. Participants who  
41  
42 lost their partners and needed to support families, especially small children, single handed  
43  
44 were more stressed. Our finding was supported by that of a study in Serbia(36).

45  
46 History of mental illness was also significantly associated with PTSD. Participants with  
47  
48 history of mental illness might have more neurochemical imbalance and neuronal damage  
49  
50 compared to those who had no history of mental illness. As a result, they might be prone to  
51  
52 develop PTSD after the event. This finding was supported by results of studies conducted  
53  
54 in various countries (31, 34, 39, 43, 44).

1  
2 The odds of developing PTSD was 2.8 times higher among respondents who had family  
3 history of mental illness than those who had no such illness. The possible explanation might  
4 be the inheritance of the serotonin transporter gene as well as genes associated with the  
5 hypothalamic–pituitary–adrenal axis and psychological factors which make participants  
6 more highly predisposed to PTSD (42, 45). This finding was consistent with the results of  
7 studies conducted in South Korea(43, 44).  
8  
9  
10  
11

12  
13 Moreover, experiencing physical injury was a stronger predictor of PTSD compared with  
14 those who experienced no such injuries during the catastrophe. The finding was similar to  
15 the results of other studies (29, 32, 41). The possible explanation for the similarity could be  
16 the presence of scars, the impaired part may remind the trauma and cause reliving it and  
17 victims may believe that the traumatic event has left its marks behind, and the body could  
18 keep clinging to unresolved issues. The odds of developing PTSD was 3.6 times higher  
19 among individuals who had poor social support than strong social support. The finding is  
20 similar to results of studies conducted in Southern Brazil and Mexico (38, 46). Lack of help  
21 to compensate for physical incapacity, emotional support, and someone to talk with about  
22 the traumatic experience or to turn to for advice could increase the risk of PTSD(47).  
23  
24  
25  
26  
27  
28  
29  
30

31 Participants who had high perceived stress were more likely to develop PTSD compared with  
32 respondents who had low perceived stress. The result is similar with findings from Southern Israel  
33 and South Korea(43, 48). Negative beliefs about the consequence of the ongoing threat as  
34 damaging implications will precipitate the onset and persistence of PTSD(49).  
35  
36  
37

### 38 **Limitation of the study**

39 The cross-sectional design of the study prevented us from concluding the casual relationships of  
40 the associations we found.  
41  
42

43 In addition, participants might not tell whether or not they had other post-traumatic stress disorder  
44 symptoms before the onset of the landslide. The presence of earlier catastrophic experience might  
45 have influenced the disorder due to the landslide.  
46  
47

48 Furthermore, social desirability and recall bias might also be the other limitations. Since the data  
49 collection method was a face-to-face interview which might led individuals to respond in socially  
50 acceptable ways during the process, especially in cases of substance-related questions.  
51  
52

53 Individuals without PTSD symptoms may have less motivation to recall earlier exposure than  
54 individuals with the symptoms.  
55  
56



1  
2 In addition, we did not consider other mental health problems that can confound outcomes. For  
3 instance, the presence and effects of anxiety and depression symptoms, which are commonly  
4 associated with PTSD symptoms and the severity of PTSD, duration of mental illness, or exposure  
5 to other diseases were not covered.  
6  
7

8  
9 The strength of the study was it used a relatively large sample and sampling methods.  
10 Since we have employed face-to-face interviews, we addressed individuals who had PTSD  
11 symptoms for further investigation and intervention.  
12  
13

## 14 **Conclusion**

15  
16 The prevalence of PTSD was found to be high. This study confirmed that the garbage landslide  
17 had a negative impact on the mental health of affected individuals. Female sex, divorce, history of  
18 mental illness, family history of mental illness, sustained physical injury, poor social support and  
19 high perceived life threat were significantly associated with PTSD. Therefore; we recommend a  
20 PTSD-focused early regular screening by trained health professionals and linkage with mental  
21 health service providers. It is necessary to give emphasis to individuals with family history of  
22 mental illness, women, and history of mental illness of those who experienced physical trauma  
23 during the disaster.  
24  
25  
26  
27  
28  
29

## 30 **Lists of abbreviation**

31  
32 AMSH: Amanuel Mental Specialized Hospital; AOR: Adjusted Odd Ratio, CI: Confidence  
33 Interval; COR: Crude Odd Ratio; DSM: Diagnostic and Statistical Manual; M.I.N.I: Mini-  
34 International Neuropsychiatric Interview ; OSS-3: Oslo 3 Items Social Support Scale; PCL-C:  
35 Post Traumatic Stress Disorder Civilian Version; PTSD: Post Traumatic Stress Disorder; QOL:  
36 Quality Of Life; SPSS: Statistical Package for Social Science; U.S: United States; UOG:  
37 University Of Gondar; WHO: World Health Organization  
38  
39  
40  
41  
42

## 43 **Acknowledgment**

44  
45 The authors acknowledge the University of Gondar and Amanuel Mental Specialized Hospital for  
46 funding the study. We extend our gratitude to data collectors, supervisors and study participants  
47 for their time and effort. We also thank Mr. Demeke Dessu for his great contribution in language  
48 editing of the manuscript.  
49  
50  
51  
52  
53  
54  
55  
56  
57  
58  
59  
60



**Authors' contribution:** SA developed the proposal, supervised the data collection, analyzed the data and wrote the draft manuscript. WG, GL, KH revised the proposal, checked the data analysis. SS, revised the proposal, check data analysis, revised and approved the manuscript.

**Funding:** The authors have not declared a specific grant for this research from any funding agency in the public, commercial or not-for-profit sectors. The funder has no role in collection, analysis and interpretation of data and in writing the manuscript

**Competing interests:** None declared

Patient consent: Informed consent was obtained from participants

**Ethical approval and consent to participate:** Ethical approval was obtained from Ethical Review Board of the University of Gondar. Ethical clearance was obtained from joint ethical review committees of the University of Gondar and Amanuel mental specialized hospital. A formal letter of permission obtained and submitted to the respective town administration.

**Provenance and peer review:** Not commissioned; externally peer reviewed.

**Data sharing statement:** The data set is available on request by emailing the corresponding author at [shumetshegay@yahoo.com](mailto:shumetshegay@yahoo.com)

**Consent to publication:** Not applicable

## References

1. Heinrichs M, Wagner D, Schoch W, Soravia LM, Hellhammer DH, Ehlert U. Predicting posttraumatic stress symptoms from pretraumatic risk factors: a 2-year prospective follow-up study in firefighters. *American Journal of Psychiatry*. 2005;162(12):2276-86.
2. Association AP. *Diagnostic and statistical manual of mental disorders (DSM-5®)*: American Psychiatric Pub; 2013.
3. Norris FH, Friedman MJ, Watson PJ, Byrne CM, Diaz E, Kaniasty K. 60,000 disaster victims speak: Part I. An empirical review of the empirical literature, 1981–2001. *Psychiatry: Interpersonal and biological processes*. 2002;65(3):207-39.
4. Burkle Jr FM. Acute-phase mental health consequences of disasters: implications for triage and emergency medical services. *Annals of emergency medicine*. 1996;28(2):119-28.
5. Gates MA, Holowka DW, Vasterling JJ, Keane TM, Marx BP, Rosen RC. Posttraumatic stress disorder in veterans and military personnel: Epidemiology, screening, and case recognition. *Psychological services*. 2012;9(4):361.

6. Galea S, Nandi A, Vlahov D. The epidemiology of post-traumatic stress disorder after disasters. *Epidemiologic reviews*. 2005;27(1):78-91.
7. L. HG. Heather Graham L. How Common is PTSD? National Center for PTSD. 2015.:1. National Center for PTSD 2015:1.
8. Kazour F, Zahreddine NR, Maragel MG, Almustafa MA, Soufia M, Haddad R, et al. Post-traumatic stress disorder in a sample of Syrian refugees in Lebanon. *Comprehensive psychiatry*. 2017;72:41-7.
9. Prince M, Patel V, Saxena S, Maj M, Maselko J, Phillips MR, et al. No health without mental health. *The lancet*. 2007;370(9590):859-77.
10. Ayuso-Mateos JL. Global Burden of post-traumatic stress disorder in the year 2000: version 1 estimates. World Health Organ. 2002.
11. Kaplan BJ. Kaplan and Sadock's Synopsis of Psychiatry. Behavioral Sciences/Clinical Psychiatry. *Tijdschrift voor Psychiatrie*. 2016;58(1):78-9.
12. Bleich A, Gelkopf M, Solomon Z. Exposure to terrorism, stress-related mental health symptoms, and coping behaviors among a nationally representative sample in Israel. *Jama*. 2003;290(5):612-20.
13. Kalia M. Assessing the economic impact of stress [mdash] The modern day hidden epidemic. *Metabolism-Clinical and Experimental*. 2002;51(6):49-53.
14. Norris FH, Murphy AD, Baker CK, Perilla JL, Rodriguez FG, Rodriguez JdJG. Epidemiology of trauma and posttraumatic stress disorder in Mexico. *Journal of abnormal psychology*. 2003;112(4):646.
15. Atwoli L, Stein DJ, Koenen KC, McLaughlin KA. Epidemiology of posttraumatic stress disorder: prevalence, correlates and consequences. *Current opinion in psychiatry*. 2015;28(4):307.
16. Ozer EJ, Best SR, Lipsey TL, Weiss DS. Predictors of posttraumatic stress disorder and symptoms in adults: a meta-analysis. *Psychological bulletin*. 2003;129(1):52.
17. Akinyemi OO, Owoaje ET, Ige OK, Popoola OA. Comparative study of mental health and quality of life in long term refugees and host populations in Oru-Ijebu, Southwest Nigeria. *BMC research notes*. 2012;5(1):394.
18. Priebe S, Matanov A, Janković Gavrilović J, McCrone P, Ljubotina D, Knežević G, et al. Consequences of untreated posttraumatic stress disorder following war in former Yugoslavia: morbidity, subjective quality of life, and care costs. *Croatian medical journal*. 2009;50(5):465-75.
19. Keane TM, Marshall AD, Taft CT. Posttraumatic stress disorder: etiology, epidemiology, and treatment outcome. *Annu Rev Clin Psychol*. 2006;2:161-97.
20. Raviteja K, MunwarBasha B, editors. Probabilistic back analysis of Koshe landfill slope failure. *Indian geotechnical conference; 2017*.
21. Organization WH. Weekly Update on Outbreaks and other Emergencies: Week 11: 11-17 March 2017. *Weekly Update on Outbreaks and other Emergencies*. 2017.
22. Catapano F, Malafronte R, Lepre F, Cozzolino P, Arnone R, Lorenzo E, et al. Psychological consequences of the 1998 landslide in Sarno, Italy: a community study. *Acta Psychiatrica Scandinavica*. 2001;104(6):438-42.
23. Karunakara UK, Neuner F, Schauer M, Singh K, Hill K, Elbert T, et al. Traumatic events and symptoms of post-traumatic stress disorder amongst Sudanese nationals, refugees and Ugandans in the West Nile. *African health sciences*. 2004;4(2):83-93.
24. Ruggiero KJ, Del Ben K, Scotti JR, Rabalais AE. Psychometric properties of the PTSD Checklist—Civilian version. *Journal of traumatic stress*. 2003;16(5):495-502.
25. Jaranson JM, Butcher J, Halcon L, Johnson DR, Robertson C, Savik K, et al. Somali and Oromo refugees: correlates of torture and trauma history. *American journal of public health*. 2004;94(4):591-8.
26. Dalgard OS. The Oslo 3-items social support scale. 20002.
27. COHEN. Perceived Stress Scale. . 1983:7–8.
28. Humeniuk R, Ali R, Babor TF, Farrell M, Formigoni ML, Jittiwutikarn J, et al. Validation of the alcohol, smoking and substance involvement screening test (ASSIST). *Addiction*. 2008;103(6):1039-47.

- 1
  - 2
  - 3
  - 4
  - 5
  - 6
  - 7
  - 8
  - 9
  - 10
  - 11
  - 12
  - 13
  - 14
  - 15
  - 16
  - 17
  - 18
  - 19
  - 20
  - 21
  - 22
  - 23
  - 24
  - 25
  - 26
  - 27
  - 28
  - 29
  - 30
  - 31
  - 32
  - 33
  - 34
  - 35
  - 36
  - 37
  - 38
  - 39
  - 40
  - 41
  - 42
  - 43
  - 44
  - 45
  - 46
  - 47
  - 48
  - 49
  - 50
  - 51
  - 52
  - 53
  - 54
  - 55
  - 56
  - 57
  - 58
  - 59
  - 60
29. Parvaresh N, Bahramnezhad A. Post-traumatic stress disorder in bam-survived students who immigrated to Kerman, four months after the earthquake. 2009.
30. Ataman M. Prevalence of PTSD and related factors in communities living in conflictual area: Diyarbakir case. 2008.
31. North CS, Nixon SJ, Shariat S, Mallonee S, McMillen JC, Spitznagel EL, et al. Psychiatric disorders among survivors of the Oklahoma City bombing. *Jama*. 1999;282(8):755-62.
32. Fitch T, Villanueva G, Quadir M, Alamgir H. Prevalence and risk factors for PTSD in injured workers in Bangladesh: a study of surviving workers from the Rana Plaza building collapse. *The Lancet Global Health*. 2015;3:S33.
33. Alghamdi M, Hunt N, Thomas S. Prevalence rate of PTSD, depression and anxiety symptoms among Saudi firefighters. *Journal of Traumatic Stress Disorders and Treatment*. 2016;6(1):1-6.
34. Tsujiuchi T, Yamaguchi M, Masuda K, Tsuchida M, Inomata T, Kumano H, et al. High prevalence of post-traumatic stress symptoms in relation to social factors in affected population one year after the Fukushima nuclear disaster. *PLoS one*. 2016;11(3):e0151807.
35. Mugisha J, Muyinda H, Wandiembe P, Kinyanda E. Prevalence and factors associated with posttraumatic stress disorder seven years after the conflict in three districts in northern Uganda (The Wayo-Nero Study). *BMC psychiatry*. 2015;15(1):170.
36. Lecic-Tosevski D, Pejuskovic B, Miladinovic T, Toskovic O, Priebe S. Posttraumatic stress disorder in a Serbian community: seven years after trauma exposure. *The Journal of nervous and mental disease*. 2013;201(12):1040-4.
37. Farhood L, Dimassi H, Lehtinen T. Exposure to war-related traumatic events, prevalence of PTSD, and general psychiatric morbidity in a civilian population from Southern Lebanon. *Journal of transcultural nursing*. 2006;17(4):333-40.
38. Brunnet AE, Bolaséll LT, Weber JL, Kristensen CH. Prevalence and factors associated with PTSD, anxiety and depression symptoms in Haitian migrants in southern Brazil. *International Journal of Social Psychiatry*. 2018;64(1):17-25.
39. Jenkins R, Othieno C, Omollo R, Onger L, Sifuna P, Mboroki J, et al. Probable post traumatic stress disorder in kenya and its associated risk factors: a cross-sectional household survey. *International journal of environmental research and public health*. 2015;12(10):13494-509.
40. Arnberg FK, Johannesson KB, Michel P-O. Prevalence and duration of PTSD in survivors 6 years after a natural disaster. *Journal of anxiety disorders*. 2013;27(3):347-52.
41. Zhou X, Kang L, Sun X, Song H, Mao W, Huang X, et al. Prevalence and risk factors of post-traumatic stress disorder among adult survivors six months after the Wenchuan earthquake. *Comprehensive psychiatry*. 2013;54(5):493-9.
42. Heim C, Newport DJ, Heit S, Graham YP, Wilcox M, Bonsall R, et al. Pituitary-adrenal and autonomic responses to stress in women after sexual and physical abuse in childhood. *Jama*. 2000;284(5):592-7.
43. Song JY, Jeong K-S, Choi K-s, Kim M-g, Ahn Y-S. Psychological risk factors for posttraumatic stress disorder in workers after toxic chemical spill in Gumi, South Korea. *Workplace health & safety*. 2018;66(8):393-402.
44. Brewin CR, Andrews B, Valentine JD. Meta-analysis of risk factors for posttraumatic stress disorder in trauma-exposed adults. *Journal of consulting and clinical psychology*. 2000;68(5):748.
45. Keane T, Fisher L, Krinsley K. Posttraumatic stress disorder, *Handbook of prescriptive treatments for adults*. Springer; 1994.
46. Kaniasty K, Norris FH. Longitudinal linkages between perceived social support and posttraumatic stress symptoms: Sequential roles of social causation and social selection. *Journal of Traumatic Stress: Official Publication of The International Society for Traumatic Stress Studies*. 2008;21(3):274-81.

- 1  
2 47. Guay S, Billette V, Marchand A. Exploring the links between posttraumatic stress disorder and  
3 social support: Processes and potential research avenues. *Journal of Traumatic Stress: Official*  
4 *Publication of The International Society for Traumatic Stress Studies*. 2006;19(3):327-38.  
5 48. Besser A, Neria Y, Haynes M. Adult attachment, perceived stress, and PTSD among civilians  
6 exposed to ongoing terrorist attacks in Southern Israel. *Personality and Individual Differences*.  
7 2009;47(8):851-7.  
8 49. Taylor S. *Clinician's guide to PTSD: A cognitive-behavioral approach*: Guilford Publications; 2017.  
9  
10  
11  
12  
13  
14  
15  
16  
17  
18  
19  
20  
21  
22  
23  
24  
25  
26  
27  
28  
29  
30  
31  
32  
33  
34  
35  
36  
37  
38  
39  
40  
41  
42  
43  
44  
45  
46  
47  
48  
49  
50  
51  
52  
53  
54  
55  
56  
57  
58  
59  
60

For peer review only

STROBE Statement—Checklist of items that should be included in reports of *cross-sectional studies*

|                              | Item No | Recommendation                                                                                                                                                                                                                                                                                                                                                                                                                                             |
|------------------------------|---------|------------------------------------------------------------------------------------------------------------------------------------------------------------------------------------------------------------------------------------------------------------------------------------------------------------------------------------------------------------------------------------------------------------------------------------------------------------|
| <b>Title and abstract</b>    | 1       | (a) Indicated in page-I, red color highlighted<br>(b) Indicated in page II and changes are highlighted                                                                                                                                                                                                                                                                                                                                                     |
| <b>Introduction</b>          |         |                                                                                                                                                                                                                                                                                                                                                                                                                                                            |
| Background/rationale         | 2       | Explained page -1 of the introduction section                                                                                                                                                                                                                                                                                                                                                                                                              |
| Objectives                   | 3       | Stated in page-2                                                                                                                                                                                                                                                                                                                                                                                                                                           |
| <b>Methods</b>               |         |                                                                                                                                                                                                                                                                                                                                                                                                                                                            |
| Study design                 | 4       | page 2                                                                                                                                                                                                                                                                                                                                                                                                                                                     |
| Setting                      | 5       | page-2                                                                                                                                                                                                                                                                                                                                                                                                                                                     |
| Participants                 | 6       | (a) page-3                                                                                                                                                                                                                                                                                                                                                                                                                                                 |
| Variables                    | 7       | Clearly define all outcomes, exposures, predictors, potential confounders, and effect modifiers. (Page-3)                                                                                                                                                                                                                                                                                                                                                  |
| Data sources/<br>measurement | 8*      | For each variable of interest, give sources of data and details of methods of assessment (measurement). ( Page-4)                                                                                                                                                                                                                                                                                                                                          |
| Bias                         | 9       | Describe any efforts to address potential sources of bias                                                                                                                                                                                                                                                                                                                                                                                                  |
| Study size                   | 10      | Explain how the study size was arrived at (page-3)                                                                                                                                                                                                                                                                                                                                                                                                         |
| Quantitative variables       | 11      | Explain how quantitative variables were handled in the analysis. (No qualitative data)                                                                                                                                                                                                                                                                                                                                                                     |
| Statistical methods          | 12      | (a) Describe all statistical methods, including those used to control for confounding (page-5)<br>(b) Describe any methods used to examine subgroups and interactions (no sub group )<br>(c) Explain how missing data were addressed (page-5 in data processing section)<br>(d) If applicable, describe analytical methods taking account of sampling strategy (page-3)<br>(e) Describe any sensitivity analyses (page-4)                                  |
| <b>Results</b>               |         |                                                                                                                                                                                                                                                                                                                                                                                                                                                            |
| Participants                 | 13*     | (a) Report numbers of individuals at each stage of study—eg numbers potentially eligible, examined for eligibility, confirmed eligible, included in the study, completing follow-up, and analysed (page-6)<br>(b) Give reasons for non-participation at each stage ( some is not voluntary, some is not present during data collection )                                                                                                                   |
| Descriptive data             | 14*     | (c) Consider use of a flow diagram (we were not using since it is not relevant here)<br>(a) Give characteristics of study participants (eg demographic, clinical, social) and information on exposures and potential confounders (page 6-7)<br>(b) Indicate number of participants with missing data for each variable of interest (page-6)                                                                                                                |
| Outcome data                 | 15*     | Report numbers of outcome events or summary measure (page-7)                                                                                                                                                                                                                                                                                                                                                                                               |
| Main results                 | 16      | (a) Give unadjusted estimates and, if applicable, confounder-adjusted estimates and their precision (eg, 95% confidence interval). Make clear which confounders were adjusted for and why they were included ( page 7-8)<br>(b) Report category boundaries when continuous variables (no continuous variable used)<br>(c) If relevant, consider translating estimates of relative risk into absolute risk for a meaningful time period (no relevancy here) |
| Other analyses               | 17      | Report other analyses done—eg analyses of subgroups and interactions, and sensitivity analyses (no)                                                                                                                                                                                                                                                                                                                                                        |

1  
2  
3  
4  
5  
6  
7  
8  
9  
10  
11  
12  
13  
14  
15  
16  
17  
18  
19  
20  
21  
22  
23  
24  
25  
26  
27  
28  
29  
30  
31  
32  
33  
34  
35  
36  
37  
38  
39  
40  
41  
42  
43  
44  
45  
46  
47  
48  
49  
50  
51  
52  
53  
54  
55  
56  
57  
58  
59  
60

| <b>Discussion</b>        |    |                                                                                                                                                                          |
|--------------------------|----|--------------------------------------------------------------------------------------------------------------------------------------------------------------------------|
| Key results              | 18 | Summarise key results with reference to study objectives (page 9-11)                                                                                                     |
| Limitations              | 19 | Discuss limitations of the study, taking into account sources of potential bias or Imprecision. Discuss both direction and magnitude of any p(page11-12)                 |
| (Interpretation          | 20 | Give a cautious overall interpretation of results considering objectives, limitations, multiplicity of analyses, results from similar studies, and other relevant (page- |
| 12) Generalisability     | 21 | Discuss the generalisability (external validity) of the study results(page -12)                                                                                          |
| <b>Other information</b> |    |                                                                                                                                                                          |
| Funding                  | 22 | Give the source of funding and the role of the funders for the present study and, if applicable, for the original study on which the present article is based(page 12)   |

\*Give information separately for exposed and unexposed groups.

**Note:** An Explanation and Elaboration article discusses each checklist item and gives methodological background and published examples of transparent reporting. The STROBE checklist is best used in conjunction with this article (freely available on the Web sites of PLoS Medicine at <http://www.plosmedicine.org/>, Annals of Internal Medicine at <http://www.annals.org/>, and Epidemiology at <http://www.epidem.com/>). Information on the STROBE Initiative is available at [www.strobe-statement.org](http://www.strobe-statement.org).
